# Supplementary material for: The Sleep Condition Indicator: a clinical screening tool to evaluate insomnia disorder
Source: PubMed Central journal article supplement — BMJ Open. 2014 Mar 18;4(3):e004183. doi: 10.1136/bmjopen-2013-004183 (PMC3964344; doi:10.1136/bmjopen-2013-004183), 2014-03-18
Supplement: bmjopen-2013-004183.draft_revisions.pdf [file bmjopen-2013-004183.draft_revisions.pdf]

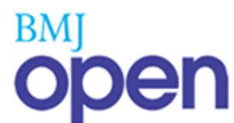

**The Sleep Condition Indicator: a clinical screening tool to  
evaluate  
DSM-5 Insomnia Disorder**

|                                    |                                                                                                                                                                                                                       |
|------------------------------------|-----------------------------------------------------------------------------------------------------------------------------------------------------------------------------------------------------------------------|
| Journal:                           | <i>BMJ Open</i>                                                                                                                                                                                                       |
| Manuscript ID:                     | bmjopen-2013-004183                                                                                                                                                                                                   |
| Article Type:                      | Research                                                                                                                                                                                                              |
| Date Submitted by the Author:      | 06-Oct-2013                                                                                                                                                                                                           |
| Complete List of Authors:          | Espie, Colin; University of Oxford,<br>Kyle, Simon; University of Manchester,<br>Hames, Peter; Sleepio Ltd.,<br>Gardani, Maria; University of Glasgow,<br>Fleming, Leanne; University of Glasgow,<br>Cape, John; UCL, |
| <b>Primary Subject<br>Heading</b>: | Mental health                                                                                                                                                                                                         |
| Secondary Subject Heading:         | Mental health                                                                                                                                                                                                         |
| Keywords:                          | SLEEP MEDICINE, PSYCHIATRY, Adult psychiatry < PSYCHIATRY                                                                                                                                                             |
|                                    |                                                                                                                                                                                                                       |

SCHOLARONE™  
Manuscripts

1  
2  
3  
4  
5  
6  
7  
8  
9  
10  
11  
12  
13  
14  
15  
16  
17  
18  
19  
20  
21  
22  
23  
24  
25  
26  
27  
28  
29  
30  
31  
32  
33  
34  
35  
36  
37  
38  
39  
40  
41  
42  
43  
44  
45  
46  
47  
48  
49  
50  
51  
52  
53  
54  
55  
56  
57  
58  
59  
60

## The Sleep Condition Indicator: a clinical screening tool to evaluate DSM-5 Insomnia Disorder

Colin A. Espie, PhD<sup>1,3</sup>, Simon D. Kyle, PhD<sup>2</sup>, Peter Hames, MA Oxon<sup>3</sup>, Maria Gardani, PhD<sup>4</sup>, Leanne Fleming, PhD<sup>4</sup>, John Cape, PhD<sup>5</sup>

<sup>1</sup> Nuffield Department of Clinical Neurosciences/ Sleep & Circadian Neuroscience Institute, University of Oxford, UK  
*Colin A. Espie, Professor*

<sup>2</sup> School of Psychological Sciences, University of Manchester, UK  
*Simon D. Kyle, Lecturer*

<sup>3</sup> Sleepio Limited, London, UK  
*Peter Hames, co-founder*

<sup>4</sup> Institute of Health & Wellbeing, University of Glasgow, UK  
*Maria Gardani, Research Fellow, Leanne Fleming, Research Fellow*

<sup>5</sup> Camden & Islington NHS Trust, London, UK  
*John Cape, Professor & Head of Psychological Therapies*

Corresponding Author:

Colin A. Espie, Nuffield Department of Clinical Neurosciences/ Sleep & Circadian Neuroscience Institute, University of Oxford, Level 6, West Wing, John Radcliffe Hospital, Oxford, OX3 9DU, UK.

Key words: insomnia, assessment, patient outcomes, DSM-5, psychometric, scale

**ABSTRACT**

*Objective:* Describe the development and psychometric validation of a brief scale [The Sleep Condition Indicator (SCI)] to evaluate DSM-5-defined Insomnia Disorder in everyday clinical practice.

*Design:* The SCI was evaluated across five studies, including large scale surveys and a placebo-controlled trial of Cognitive Behavioural Therapy (CBT) for insomnia. Content validity, internal consistency, sensitivity and specificity, concurrent validity, and responsiveness to change were investigated.

*Participants:* 30,941 individuals (71% female) completed the SCI along with other descriptive demographic and clinical information.

*Setting:* Data acquired on dedicated web-sites.

*Results:* The 8-item SCI (concerns about getting to sleep, remaining asleep, sleep quality, daytime personal functioning, daytime performance, duration of sleep problem, nights per week having a sleep problem, and extent troubled by poor sleep) had robust internal consistency ( $\alpha \geq 0.86$ ), and 92% sensitivity (SCI score  $\leq 4.6$ ) / 87% specificity (SCI score  $>4.6$ ) for Insomnia Disorder. Sensitivity to treatment outcome using CBT (relative) to placebo was demonstrated in a randomised trial ( $d=0.95$ ). A 2-item short-form (SCI-02: nights per week having a sleep problem, extent troubled by poor sleep), derived using logistic regression modelling, correlated strongly with the SCI total score ( $r=.90$ ).

*Conclusions:* The SCI has potential as a clinical screening tool for appraising insomnia complaints against DSM-5 criteria.

### **STRENGTHS AND LIMITATIONS**

- Existing instruments used to evaluate insomnia lack specificity or do not permit assessment against the latest diagnostic criteria. This study describes the development and validation of a new instrument (the sleep condition indicator) for use in everyday clinical practice. The SCI is valid, reliable and sensitive to change in insomnia severity. Its brevity and appealing visual format permit rapid assessment and interpretation of poor sleep, against contemporary clinical diagnostic criteria (DSM-5).
- While we have used large surveys and treatment evaluation to assess SCI properties, more work is required to assess predictive validity with reference to independent clinical evaluation of Insomnia Disorder.

## INTRODUCTION

Although insomnia is the most common of all mental health complaints,<sup>1</sup> it is seldom adequately assessed and treatment is often poor.<sup>2,3</sup> This perhaps reflects the perspective that insomnia is usually a symptom,<sup>4</sup> coupled with minimal medical education on sleep and its disorders.<sup>5</sup> However, there are three reasons why this perspective must now change. First, insomnia is not merely a symptom. The DSM-5 Workgroup has recognised that the dichotomy of primary versus secondary insomnia is simply not evidence-based.<sup>6</sup> Accordingly, DSM-5 (due May 2013), is set to recommend that Insomnia Disorder should be coded "*whenever diagnostic criteria are met whether or not there is a co-existing physical, mental or sleep disorder*".<sup>7</sup> Moreover, insomnia is not necessarily transient or benign. Once established, insomnia is remarkably persistent,<sup>8,9</sup> and constitutes a risk factor for the development of physical and mental health problems, notably depression,<sup>10-12</sup> as well as adverse effects upon quality of life.<sup>13</sup> Third, insomnia is treatable. There is a substantial level 1 evidence-base, evaluating pharmacological and cognitive-behavioural therapies (CBT),<sup>14,15</sup> although the latter are very seldom available.<sup>3,16</sup>

Insomnia is ubiquitous<sup>17</sup> so it is important that clinicians, GPs in particular, have a reliable, valid, and brief, screening tool. Such instruments are now a standard part of patient-centred care<sup>18</sup> for depression,<sup>19</sup> anxiety<sup>20</sup> and alcohol problems.<sup>21</sup> Two potential scales are the Pittsburgh Sleep Quality Index (PSQI)<sup>22</sup> and the Insomnia Severity Index (ISI).<sup>23</sup> The PSQI is widely used in research, and has a cut-off score indicative of sleep disturbance. However, it lacks specificity for insomnia. The ISI is sound psychometrically, and is more specific; but based on DSM-IV criteria for insomnia. It is used to select people for clinical trials and as an outcome measure.

In this paper, we present a new measure (the Sleep Condition Indicator: SCI) offering possible advantages. The SCI is based on DSM-5 insomnia criteria coupled with research diagnostic criteria<sup>24</sup> and recommended quantitative parameters for sleep disturbance.<sup>25</sup> In keeping with DSM-5, the SCI also evaluates associated

1  
2  
3 daytime factors, which are important drivers of clinical complaint<sup>17</sup> and should be  
4 incorporated in insomnia measurement.<sup>13,26</sup> In terms of utility, the SCI is brief but  
5 versatile. It yields a) a dimensional perspective on sleep quality: on an intuitive,  
6 global 0-10 scale where higher scores represent better sleep; b) a visual profile of  
7 night-time and daytime symptoms that the clinician can use in consultations; and c)  
8 cut-off points for clinical Insomnia Disorder. This paper summarises the development  
9 and psychometric evaluation of the SCI across several studies.  
10  
11  
12  
13  
14  
15  
16  
17  
18

## 19 **METHODS**

### 20 **Sample characteristics**

21 Data are reported from five validation studies (total n=30,941; 71% Female) in which  
22 SCI items were administered. The Great British Sleep Survey (GBSS) was an open  
23 access, web-based survey completed by adults (18+yr.) with a UK postcode yielding  
24 data on 12,628 participants [72% Female; mean age = 38.7yr (SD = 14.5)] between  
25 February 2010 and August 2011.<sup>27</sup> The GBSS+ was a revision of the GBSS,  
26 extended to any valid zip code worldwide, from May 2011 to March 2012 (n=11,017;  
27 68% Female; 42.3yr (16.5)). The TV sample was obtained in response to a network  
28 programme (The Food Hospital, Channel 4) on the sleep benefits of tart cherry juice  
29 (n=6,876; 76% F, 36.4yr (13.3)). Glasgow Science Centre data (n=256; 56% Female,  
30 40.3yr (14.9)) were collected in 2009-2010 during a study which assessed the  
31 relationship between salivary alpha-amylase, sleep pressure and diurnal  
32 preference.<sup>28</sup> Finally, an RCT sample comprised 164 participants (72% F, 48.9yr  
33 (13.7)) recruited in February 2011 into a placebo-controlled evaluation of CBT for  
34 insomnia.<sup>29</sup>  
35  
36  
37  
38  
39  
40  
41  
42  
43  
44  
45  
46  
47  
48  
49  
50

51 Across our combined largest samples (GBSS, GBSS+, TV), women were  
52 slightly younger than men [38.5 (14.9) vs 40.1 (14.7) yrs;  $t(27638) = 7.94, p < .0001$ ]  
53 and the great majority was in average or better physical health (86%) and mental  
54 health (82%) [5-point scale: 0 'very good', 1 'good', 2 'average', 3 'poor', 4 'very  
55  
56  
57  
58  
59  
60

1  
2  
3 poor']. Around 57% screened positive for possible DSM-5 Insomnia Disorder.<sup>27</sup>  
4  
5 These are not prevalence data as we did not adopt a formal population sampling  
6  
7 approach. Nevertheless, the inevitable bias of these open access surveys towards  
8  
9 those with sleep concerns does permit us a) to profile many respondents, against  
10  
11 criteria;<sup>27</sup> b) to conduct powerful analyses of the properties of the SCI; and c) to make  
12  
13 comparisons with sizeable cohorts of good sleepers. Respondents who made some  
14  
15 use of prescription sleeping pills (9.1%) were 7 years older than those who did not  
16  
17 [46.2 (15.1) vs 39.1 (15.1)yr,  $t(20813) = 19.6$ ,  $p < .0001$ ]. A higher proportion took  
18  
19 over-the-counter sleep aids (OTCs; 18.1%), and more than one-third of those taking  
20  
21 sleeping pills also used OTCs.  
22  
23  
24

## 25 **Design and Measurement**

26  
27 This is a psychometric scale development study. Standard approaches to the  
28  
29 appraisal of validity, reliability and sensitivity were applied, making appropriate  
30  
31 selection amongst the available datasets. These methods and datasets will be  
32  
33 introduced in an integrated way in subsequent sections, so that the research process  
34  
35 can be more clearly expressed and understood.  
36  
37  
38

## 39 **RESULTS**

### 40 **Development of the Sleep Condition Indicator (SCI)**

#### 41 *Content Validity*

42  
43 An 8-item scale was developed (see Appendix) based strictly upon DSM-5  
44  
45 recommendations.<sup>6,7</sup> The SCI comprised 2 quantitative items on sleep continuity  
46  
47 [item 1: getting to sleep; item 2: remaining asleep], two qualitative items on sleep  
48  
49 satisfaction/dissatisfaction [item 4: sleep quality; item 7: troubled or not], two  
50  
51 quantitative items on severity [item 3: nights per week; item 8: duration of problem],  
52  
53 and two qualitative items on attributed daytime consequences of poor sleep [item 5:  
54  
55  
56  
57  
58  
59  
60

1  
2  
3 effects on mood, energy, or relationships (personal functioning); item 6: effects on  
4 concentration, productivity, or ability to stay awake (daytime performance)].  
5  
6  
7

8  
9 Validated quantitative criteria for sleep disruption (e.g. 31-45 minutes to fall asleep)  
10 served as responses for sleep continuity items 1 and 2.<sup>7,24,25</sup> Items 5 and 6 on  
11 daytime effects were derived by Principal Components Analysis (PCA; Varimax  
12 rotation) of six individual proposed DSM-5 impact areas, using combined datasets  
13 (GBSS, GBSS+, TV, RCT: valid n= 29,650). PCA yielded satisfactory Kaiser-Meyer-  
14 Olkin (KMO=0.874) and Bartlett ( $p<.0001$ ) statistics. Iteration converged after 3  
15 rotations. A two component model explained 75.8% of variance. Component 1  
16 (Eigenvalue=3.83; 63.8% of variance) comprised 'mood' (loading = .812) 'energy'  
17 (.651) and 'relationships' (.859), and was subsequently named 'personal functioning'.  
18 Component 2 (Eigenvalue=0.72; 12.0% of variance) comprised 'concentration'  
19 (.719), 'get through work' (.724), and 'stay awake' (.875) may be regarded as  
20 'daytime performance'. PCA offered a relatively pure solution, although 'energy' also  
21 loaded significantly on component 2 (.519).  
22  
23  
24  
25  
26  
27  
28  
29  
30  
31  
32  
33  
34  
35  
36  
37

38 We then investigated the inter-relationships of our 8 SCI items. PCA with Varimax  
39 Rotation (KMO=0.888; Bartlett,  $p<.0001$ ) yielded a two component solution (66.4%  
40 explained variance). Component 1 (Eigenvalue=4.256, 53.2% variance), named  
41 'sleep pattern' comprised items 1, 2, 3, 4 and 8 with factor loading ranging from 0.453  
42 to 0.776. Component 2 (Eigenvalue=1.06, 13.2% variance), 'sleep-related impact'  
43 comprised item 5 (factor loading 0.886), and item 6 (0.911). Consistent with clinical  
44 presentation, concerns about sleep (item 7) loaded significantly, and similarly, on  
45 both 'sleep pattern' (0.616) and 'sleep-related impact' components (0.576).  
46  
47  
48  
49  
50  
51  
52  
53  
54  
55  
56  
57  
58  
59  
60



### *Response format*

Each item was scored on a 5-point scale (0 - 4), with lower scores, in the 0 – 2 range, reflecting threshold criteria for DSM-5 Insomnia Disorder (shaded area: see Appendix). The clinician can then see at a glance the profile of possible concerns. Possible total score ranges from 0 – 32, with higher values indicative of better sleep. However, scores can be readily transformed into a more intuitive 0 - 10 SCI range, either by dividing the total by 3.2, or by using an online version with automated scoring, which will shortly be available free of charge.

### *Concurrent Validity and association with related domains*

Data from the Science Centre sample demonstrated that the SCI correlates inversely with the PSQI ( $r=-.734$ ) and the ISI ( $r=-.793$ ), suggesting measurement properties consistent with these related measures. In the GBSS and GBSS+ samples, the SCI of those taking prescribed sleeping pills or OTCs was lower (by 2.2 and 1.6 points respectively: equivalent to approximately 1.0 SD). There was also a small but significant association of sleep condition with self-rated physical health ( $r=.222$ ), and an association also with mental health ( $r=.335$ ). Using more specific measures, in the Science Centre sample, correlation of the SCI with symptoms of depression ( $r=-.426$ ) and anxiety ( $r=-.400$ ) on the Hospital Anxiety and Depression Scale<sup>30</sup> was modest, and greater than we observed in our RCT sample [on the Depression Anxiety Stress Scale<sup>31</sup>: depression ( $r=-.267$ ), anxiety ( $r=-.236$ ) and stress ( $r=-.263$ )].

### *Sensitivity/ Specificity of SCI*

The GBSS dataset was used to investigate discriminant validity. Applying cut-offs of  $SCI \leq 15$  (on the 0-32 scaled version) and  $SCI \leq 4.6$  (on the 0–10 scaled version) correctly identified 92% of people scoring positive for minimal DSM-5 ID criteria (sensitivity),<sup>27</sup> whereas  $SCI > 16$  and  $SCI > 4.6$ , respectively, correctly identified 87% of individuals who did not meet criteria.

### *Internal consistency*

Cronbach's  $\alpha$  for the GBSS sample was strong at 0.857 (range of  $\alpha$ -if-item-deleted 0.822-0.860). Replication of these internal consistency data was obtained from the GBSS+ sample ( $\alpha=0.865$ ). Mean corrected item-total correlation was moderate ( $r=0.620$ ) indicating substantial unique variance per item (shared variance = 38%).

### *Sensitivity to change*

We evaluated sensitivity in our RCT.<sup>29</sup> Mean baseline to post-treatment change on the SCI was 3.24 (CI 2.64 to 3.83), and to 8-week post-treatment follow-up was 3.53 (CI 2.91 to 4.13), reflecting standardised ES of  $d=1.20$  and  $d=1.11$  in favour of CBT relative to TAU, and  $d=0.95$  and  $d=0.77$  relative to placebo.

### **Short-form version of the SCI**

Although the SCI is brief, in clinical practice ultra short-form scales are often helpful (e.g. GAD-2).<sup>32</sup> Accordingly, we conducted a logistic regression analysis to determine which subset of items explained the greatest proportion of variance in the SCI total score. A two-item (SCI-02), comprising item 3 '...how many nights' (standardized  $\beta = .515$ ) and item 8 '... troubled you in general' ( $\beta = .491$ ) together predicted 82% of variance (Adjusted  $R^2 = .820$ ) in the full scale SCI [ $R^2$  change =  $.672 + .148$ ;  $F(2,27637) = 62770$ ,  $p < .0001$ ]. The SCI-02 also correlated strongly with the SCI score total ( $r = .904$ ). Applying ROC analyses,  $SCI-02 \leq 3$  (on the 0-8 scaled version) correctly identified 87% of people scoring positive for ID (sensitivity), whereas  $SCI-02 > 3$  correctly identified 91% of individuals who did not meet DSM-5 criteria.

## DISCUSSION

Neither patients nor physicians quite know what to do about insomnia.<sup>33</sup> It is a common subjective complaint, difficult to evaluate, and with no clear pathway for its management.<sup>3,16,17</sup> Despite the majority being unsure whether or not to mention it to their doctor,<sup>34</sup> twelve million prescriptions are written annually in the UK,<sup>35</sup> to doubtful benefit.<sup>36-38</sup> If insomnia were simply a transient blemish then all this might not matter. However, consistent with the fact that sleep, like oxygen, water and food, is crucial to effective functioning,<sup>39</sup> there is mounting evidence that poor sleep often becomes persistent,<sup>8,9</sup> and that persistent insomnia is detrimental to health and wellbeing.<sup>10-13</sup>

Pre-requisite to improved care is the availability, and regular use, of reliable and valid insomnia assessment. Only then can a clinical problem be recognised as distinct from normal variation, and a persistent problem be differentiated from a transient one. We have reported here the development and validation of the SCI; a DSM-5 compliant, brief screening measure that may be fit for such purposes. Importantly, the SCI items reflect the underlying complaint of insomnia; that is, concerns about sleep pattern and concerns about the impact of poor sleep, both of which need to be addressed in clinical practice. The SCI, at 8 items, is simple and quick to complete and, based on several sizable studies, it has very promising psychometric characteristics. The derived 2-item short-form version focuses upon the severity of the presenting complaint coupled with frequency of the sleep problem, so we would suggest that these might be the lead questions for a clinician to use in the context of their consulting room practice.

Of course, further work is required, particularly real world studies of how the SCI might be used in population screening and in the evaluation of outcome following an episode of care. Studies of predictive validity with reference to independent clinical evaluation of Insomnia Disorder would be welcome. Finally, it should be noted that the SCI does not contain specific questions relating to early morning awakenings

1  
2  
3 (EMA; premature awakening with inability to return to sleep) – a symptom which has  
4 recently been incorporated into DSM-5 criteria. However, to our knowledge,  
5 quantitative values for EMA are yet to be defined. To some extent, SCI item 2 on  
6 wakefulness during the night may capture this complaint, but we recommend that the  
7 clinician follows-up a 'positive' answer to locate the nature and temporal position of  
8 wakefulness during the sleep period.  
9  
10  
11  
12  
13  
14

### 15 16 17 **Contributorship Statement**

18 All authors engaged in the following study tasks:

- 19  
20  
21 1) substantial contributions to conception and design, acquisition of data, or analysis  
22 and interpretation of data;  
23  
24  
25 2) drafting the article or revising it critically for important intellectual content; and  
26  
27  
28 3) final approval of the version to be published.  
29  
30

### 31 **Competing Interests**

32 All authors have completed the ICMJE uniform disclosure form and declare: CE is  
33 Clinical and Scientific Director of Sleepio Ltd. and PH is co-founder, shareholder and  
34 board member of Sleepio Ltd. SK has acted as a consultant for Sleepio Ltd.  
35  
36  
37  
38  
39  
40  
41  
42  
43  
44  
45  
46  
47  
48  
49  
50  
51  
52  
53  
54  
55  
56  
57  
58  
59  
60

**REFERENCES**

1. Singleton N, Bumpstead R, O'Brien M, et al. Psychiatric morbidity among adults living in private households, 2000. London: The Office for National Statistics, HMSO; 2001.
2. Morin CM, Benca R. Chronic insomnia. *Lancet* 2012;379(9821):1129-41.
3. Falloon K, Arroll B, Elley CR, Fernando A. The assessment and management of insomnia in primary care. *BMJ* 2011; 342: d2899.
4. Lichstein K. Secondary insomnia: A myth dismissed. *Sleep Med Rev* 2006; 10: 3-5.
5. Stores G, Crawford C. Medical student education in sleep and its disorders. *J Royal College Physicians London* 1998; 32:149-153.
6. Reynolds CF, Redline S. The DSM-V sleep-wake disorders nosology: An update and an invitation to the sleep community. *J Clin Sleep Med* 2010;15;9-10.
7. American Psychiatric Association. M00 Insomnia Disorder. DSM-5 Development Web site.  
<http://www.dsm5.org/ProposedRevision/Pages/proposedrevision.aspx?rid=65#>  
/ Updated June 2, 2010.
8. Morin CM, Belanger L, LeBlanc M, et al. The natural history of insomnia: A population-based 3-year longitudinal study. *Archives of internal Medicine* 2009; 169:447-453.
9. Green, M., Benzeval, M., Espie, C.A., Hunt, K. The longitudinal course of insomnia symptoms: inequalities by gender and occupational class among two different age cohorts followed for 20 years in the West of Scotland. *SLEEP* 2012;35:385-393.

- 1  
2  
3 10. Vgontzas AN, Liao D, Bixler EO, Chrousos GP, Vela-Bueno A. Insomnia with  
4 objective short sleep duration is associated with a high risk for hypertension  
5 Sleep 2009;32:491-7.  
6  
7
- 8  
9 11. Vgontzas AN, Liao D, Pejovic S, Calhoun S, Karataraki M, Bixler EO.  
10 Insomnia with objective short sleep duration is associated with type 2  
11 diabetes: a population-based Study. Diabetes Care 2009;32:1980-5.  
12  
13
- 14 12. Baglioni C, Battagliese G, Feige B, et al. Insomnia as a predictor of  
15 depression: A meta-analytic evaluation of longitudinal epidemiological  
16 studies. J Affect Disord 2011;135:10-19.  
17  
18
- 19 13. Kyle SD, Morgan K, Espie C. Insomnia and health-related quality of life. Sleep  
20 Med Rev 2010;14: 69-82.  
21  
22
- 23 14. Morin CM, Bootzin RR, Buysse DJ, Edinger JD, Espie CA, Lichstein KL.  
24 Psychological and behavioral treatment of insomnia: Update of the recent  
25 evidence (1998-2004). Sleep 2006;29:1398-414.  
26  
27
- 28 15. Riemann D, Perlis ML. The treatments of chronic insomnia: A review of  
29 benzodiazepine receptor agonists and psychological and behavioral  
30 therapies. Sleep Med Rev 2009;13:205-214.  
31  
32
- 33 16. Espie, C.A. 'Stepped care': a health technology solution for delivering  
34 Cognitive Behavioral Therapy as a first line insomnia treatment. Sleep  
35 2009;32:1549-1558.  
36  
37
- 38 17. Morin CM, LeBlanc M, Daley JP, Merette C. Epidemiology of insomnia:  
39 Prevalence, self-help treatments, consultations, and determinants of help-  
40 seeking behaviors. Sleep Med 2006; 7: 123-130.  
41  
42
- 43 18. NICE Clinical Guideline 123. Common mental health disorders: Identification  
44 and pathways to care. 2011.  
45  
46  
47  
48  
49  
50  
51  
52  
53  
54 <http://www.nice.org.uk/nicemedia/live/13476/54520/54520.pdf>  
55  
56  
57  
58  
59  
60

- 1  
2  
3 19. Kroenke, K., Spitzer, R.L. and Williams, J.B. (2001). The PHQ-9: Validity of a  
4 brief depression severity measure. *Journal of General Internal Medicine*,  
5 16:606–613.  
6  
7  
8  
9 20. Spitzer, R.L., Kroenke, K., Williams, J.B.W. and Lowe, B. (2006). A brief  
10 measure for assessing generalized anxiety disorder: The GAD-7. *Archives of*  
11 *Internal Medicine*, 166:1092–1097  
12  
13  
14  
15 21. Bush, K., Kivlahan, D.R., McDonnell, M.B. et al. The AUDIT alcohol  
16 consumption questions (AUDIT-C): An effective brief screening test for  
17 problem drinking. *Arch Intern Med* 1998; 158; 1789-1795.  
18  
19  
20  
21 22. Buysse DJ, Reynolds III CF, Monk TH, et al. The Pittsburgh Sleep Quality  
22 Index: a new instrument for psychiatric practice and research. *Psych Res*  
23 1989; 28: 193–213.  
24  
25  
26  
27 23. Morin C.M. *Insomnia: Psychological assessment and management*. 1993.  
28 New York: Guilford.  
29  
30  
31 24. Edinger JD, Bonnet MH, Bootzin RR, Doghramji K, Dorsey CM, Espie CA et  
32 al. Derivation of research diagnostic criteria for insomnia: Report of an  
33 American Academy of Sleep Medicine Work Group. *Sleep*. 2004;27:1567-96.  
34  
35  
36  
37 25. Lichstein KL, Durrence HH, Taylor DJ, Bush AJ, Riedel BW. Quantitative  
38 criteria for insomnia. *Behav Res Ther* 2003;41:427-445.  
39  
40  
41  
42 26. Moul DE, Hall M, Pilkonis PA, Buysse, DJ. Self-report measures of insomnia  
43 in adults: rationales, choices, and needs. *Sleep Med Rev* 2004; 8: 177-198.  
44  
45  
46 27. Espie CA, Kyle SD, Hames P, Cyhlarova E, Benzeval. The daytime impact of  
47 DSM-5 Insomnia Disorder: comparative analysis of insomnia subtypes from  
48 the Great British Sleep Survey (n=11,129). *J Clin Psychiatry* 73(12):e1478-  
49 1484  
50  
51  
52  
53 28. Gardani M, Miller CB, Biello S, Ellis J, Von Schantz M, Archer S. The  
54 association of sleepiness and diurnal preference with salivary amylase  
55  
56  
57  
58  
59  
60

- 1  
2  
3 activity. Abstracts of 4th International Congress of WASM & 5th Conference  
4 of CSS / Sleep Medicine 12, Suppl. 1 (2011) S1–S130.  
5  
6  
7 29. Espie CA, Kyle SD, Williams C, et al. A randomized, placebo-controlled, trial  
8 of online Cognitive Behavioral Therapy for chronic Insomnia Disorder  
9 delivered via an automated media-rich web application. *Sleep* 2012; 35: 769-  
10 781.  
11  
12 30. Zigmond AS, Snaith RP. The hospital anxiety and depression scale. *Acta*  
13 *Psychiatrica Scandinavica* 1983; 67: 361-370.  
14  
15 31. Henry JD, Crawford JR. The short-form version of the Depression Anxiety  
16 Stress Scales (DASS-21): Construct validity and normative data in a large  
17 non-clinical sample, *Br J Clin Psychol* 2005;44:227-239.  
18  
19 32. Kroenke K, Spitzer RL, Williams JB, et al. Anxiety disorders in primary care:  
20 prevalence, impairment, comorbidity, and detection. *Ann Intern Med*  
21 2007;146:317–25.  
22  
23 33. Dyas JV, Apekey TA, Tilling M, Orner R, Middleton H, Siriwardena AN.  
24 Patients' and clinicians' experiences of consultation in primary care for sleep  
25 problems and insomnia: a focus group. *Br J Gen Pract* 2010;60:329-333.  
26  
27 34. Stinson K, Tang NKY, Harvey AG. Barriers to treatment seeking in primary  
28 insomnia in the United Kingdom: a cross-sectional perspective. *Sleep* 2006;  
29 29:1643-1646.  
30  
31 35. National Institute of Clinical Excellence. NICE implementation uptake report:  
32 insomnia - newer hypnotic drugs. 2006.  
33 (<http://www.nice.org.uk/media/640/85/TA77NICEImplUptake.pdf>)  
34  
35 36. Glass J, Lanctot KL, Herrmann N, Sproule BA, Busto UE. Sedative hypnotics  
36 in older people with insomnia: meta-analysis of risks and benefits. *BMJ* 2005;  
37 331(7526):1169.  
38  
39 37. Kripke D. Hypnotic drugs: deadly risks, doubtful benefits. *Sleep Med Rev*  
40 2000;4:5-20.  
41  
42  
43  
44  
45  
46  
47  
48  
49  
50  
51  
52  
53  
54  
55  
56  
57  
58  
59  
60



- 1  
2  
3 38. Kripke DF, Langer RD, Kline LE. Hypnotics' association with mortality or  
4 cancer: a matched cohort study. BMJ Open 2012;2:e000850.  
5  
6 doi:10.1136/bmjopen-2012-000850.  
7  
8  
9 39. Luyster FS, Strollo PJ, Zee P, et al. Sleep: A health imperative. SLEEP 2012;  
10  
11 35: 727-734.  
12  
13  
14  
15  
16  
17  
18  
19  
20  
21  
22  
23  
24  
25  
26  
27  
28  
29  
30  
31  
32  
33  
34  
35  
36  
37  
38  
39  
40  
41  
42  
43  
44  
45  
46  
47  
48  
49  
50  
51  
52  
53  
54  
55  
56  
57  
58  
59  
60

## Appendix: The Sleep Condition Indicator

| Item                                                                                                                | Score                           |             |             |             |           |
|---------------------------------------------------------------------------------------------------------------------|---------------------------------|-------------|-------------|-------------|-----------|
|                                                                                                                     | 4                               | 3           | 2           | 1           | 0         |
| <b>Thinking about a typical night in the last month ...</b>                                                         |                                 |             |             |             |           |
| 1. ... how long does it take you to fall asleep?                                                                    | 0 – 15 min                      | 16 – 30 min | 31 – 45 min | 46 – 60 min | ≥ 61 min  |
| 2. ... if you then wake up during the night ... how long are you awake for in total?<br>(add all the awakenings up) | 0 – 15 min                      | 16 – 30 min | 31 – 45 min | 46 – 60 min | ≥ 61 min  |
| 3. ... how many nights a week do you have a problem with your sleep?                                                | 0 - 1                           | 2           | 3           | 4           | 5 - 7     |
| 4. ... how would you rate your sleep quality?                                                                       | Very good                       | Good        | Average     | Poor        | Very poor |
| <b>Thinking about the past month, to what extent has poor sleep ...</b>                                             |                                 |             |             |             |           |
| 5. ... affected your mood, energy, or relationships?                                                                | Not at all                      | A little    | Somewhat    | Much        | Very much |
| 6. ... affected your concentration, productivity, or ability to stay awake                                          | Not at all                      | A little    | Somewhat    | Much        | Very much |
| 7. ... troubled you in general                                                                                      | Not at all                      | A little    | Somewhat    | Much        | Very much |
| <b>Finally ...</b>                                                                                                  |                                 |             |             |             |           |
| 8. ... how long have you had a problem with your sleep?                                                             | I don't have a problem / < 1 mo | 1 – 2 mo    | 3 – 6 mo    | 7 – 12 mo   | > 1 yr    |

## Scoring instructions:

- Add the item scores to obtain the SCI total (minimum 0, maximum 32)
- A higher score means better sleep
- Scores can be converted to 0 – 10 format (minimum 0, maximum 10) by dividing total by 3.2
- Item scores in grey area represent threshold criteria for DSM-5 Insomnia Disorder

A free online version, with built-in score convertor, will shortly be available



**The Sleep Condition Indicator: a clinical screening tool to  
evaluate  
Insomnia Disorder**

|                                    |                                                                                                                                                                                                                       |
|------------------------------------|-----------------------------------------------------------------------------------------------------------------------------------------------------------------------------------------------------------------------|
| Journal:                           | <i>BMJ Open</i>                                                                                                                                                                                                       |
| Manuscript ID:                     | bmjopen-2013-004183.R1                                                                                                                                                                                                |
| Article Type:                      | Research                                                                                                                                                                                                              |
| Date Submitted by the Author:      | 19-Dec-2013                                                                                                                                                                                                           |
| Complete List of Authors:          | Espie, Colin; University of Oxford,<br>Kyle, Simon; University of Manchester,<br>Hames, Peter; Sleepio Ltd.,<br>Gardani, Maria; University of Glasgow,<br>Fleming, Leanne; University of Glasgow,<br>Cape, John; UCL, |
| <b>Primary Subject<br>Heading</b>: | Mental health                                                                                                                                                                                                         |
| Secondary Subject Heading:         | Mental health                                                                                                                                                                                                         |
| Keywords:                          | SLEEP MEDICINE, PSYCHIATRY, Adult psychiatry < PSYCHIATRY                                                                                                                                                             |
|                                    |                                                                                                                                                                                                                       |

SCHOLARONE™  
Manuscripts

The Sleep Condition Indicator: a clinical screening tool to evaluate  
Insomnia Disorder

Colin A. Espie, PhD<sup>1,3</sup>, Simon D. Kyle, PhD<sup>2</sup>, Peter Hames, MA Oxon<sup>3</sup>, Maria Gardani, PhD<sup>4</sup>, Leanne Fleming, PhD<sup>4</sup>, John Cape, PhD<sup>5</sup>

<sup>1</sup> Nuffield Department of Clinical Neurosciences/ Sleep & Circadian Neuroscience Institute, University of Oxford, UK  
*Colin A. Espie, Professor*

<sup>2</sup> School of Psychological Sciences, University of Manchester, UK  
*Simon D. Kyle, Lecturer*

<sup>3</sup> Sleepio Limited, London, UK  
*Peter Hames, co-founder*

<sup>4</sup> Institute of Health & Wellbeing, University of Glasgow, UK  
*Maria Gardani, Research Fellow, Leanne Fleming, Research Fellow*

<sup>5</sup> Camden & Islington NHS Trust, London, UK  
*John Cape, Professor & Head of Psychological Therapies*

Corresponding Author:

Colin A. Espie, Nuffield Department of Clinical Neurosciences/ Sleep & Circadian Neuroscience Institute, University of Oxford, Level 6, West Wing, John Radcliffe Hospital, Oxford, OX3 9DU, UK.

Key words: insomnia, assessment, patient outcomes, DSM-5, psychometric, scale

**ABSTRACT**

*Objective:* Describe the development and psychometric validation of a brief scale [The Sleep Condition Indicator (SCI)] to evaluate Insomnia Disorder in everyday clinical practice.

*Design:* The SCI was evaluated across five studies, including large scale surveys and a placebo-controlled trial of Cognitive Behavioural Therapy (CBT) for insomnia. Content validity, internal consistency, concurrent validity, and responsiveness to change were investigated.

*Participants:* 30,941 individuals (71% female) completed the SCI along with other descriptive demographic and clinical information.

*Setting:* Data acquired on dedicated web-sites.

*Results:* The 8-item SCI (concerns about getting to sleep, remaining asleep, sleep quality, daytime personal functioning, daytime performance, duration of sleep problem, nights per week having a sleep problem, and extent troubled by poor sleep) had robust internal consistency ( $\alpha \geq 0.86$ ) and showed convergent validity with the Pittsburgh Sleep Quality Index and Insomnia Severity Index.. Sensitivity to treatment outcome using CBT (relative) to placebo was demonstrated in a randomised trial ( $d=0.95$ ). A 2-item short-form (SCI-02: nights per week having a sleep problem, extent troubled by poor sleep), derived using linear regression modelling, correlated strongly with the SCI total score ( $r=.90$ ).

*Conclusions:* The SCI has potential as a clinical screening tool for appraising insomnia complaints against DSM-5 criteria.

### **STRENGTHS AND LIMITATIONS**

- Existing instruments used to evaluate insomnia lack specificity or do not permit assessment against the latest diagnostic criteria. This study describes the development and validation of a new instrument (the sleep condition indicator) for use in everyday clinical practice. The SCI is valid, reliable and sensitive to change in insomnia severity. Its brevity and appealing visual format permit rapid assessment and interpretation of poor sleep, against contemporary clinical diagnostic criteria.
- While we have used large surveys and treatment evaluation to assess SCI properties, more work is required to assess predictive validity with reference to independent clinical evaluation of Insomnia Disorder.

## INTRODUCTION

Although insomnia is the most common of all mental health complaints,<sup>1</sup> it is seldom adequately assessed and treatment services are often poor.<sup>2,3</sup> This perhaps reflects the perspective that insomnia is usually a symptom,<sup>4</sup> coupled with minimal medical education on sleep and its disorders.<sup>5</sup> However, there are three reasons why this perspective must now change. First, insomnia is not merely a symptom. It has for some time been proposed as a genuine diagnosis (see Harvey review),<sup>6</sup> and recently the DSM-5 Workgroup recognised that the previous dichotomy of primary versus secondary insomnia is not evidence-based.<sup>7,8</sup> Accordingly, DSM-5 now recommends that 'Insomnia Disorder' should be coded "*whenever diagnostic criteria are met whether or not there is a co-existing physical, mental or sleep disorder*".<sup>9</sup> Second, insomnia is not necessarily transient or benign. Once established, it is remarkably persistent,<sup>10,11</sup> constituting a risk factor for the development of physical and mental health problems, notably depression,<sup>12-14</sup> as well as adverse effects upon quality of life.<sup>15</sup> Chronic insomnia is also associated with high societal cost,<sup>16</sup> and is, for example, a robust predictor of work disability.<sup>17</sup> Third, insomnia is treatable. There is a very substantial level 1 evidence-base, evaluating pharmacological and cognitive-behavioural therapies (CBT),<sup>18,19</sup> although the latter are very seldom available.<sup>3,20</sup>

Insomnia is ubiquitous<sup>21</sup> so it is important that clinicians, GPs in particular, have a reliable, valid, and brief, screening tool. A wide range of such instruments is a standard part of patient-centred care,<sup>22</sup> for example, for depression,<sup>23</sup> anxiety<sup>24</sup> and alcohol problems.<sup>25</sup> In the insomnia field, two scales in particular are widely used: the Pittsburgh Sleep Quality Index (PSQI)<sup>26</sup> and the Insomnia Severity Index (ISI).<sup>27</sup> The PSQI is an established research tool, which has a cut-off score indicative of sleep disturbance. However, it lacks specificity for insomnia. The ISI is very sound psychometrically, and is more specific and based on DSM-IV criteria for insomnia. It is used in the main to select people for clinical trials and as an outcome measure.

1  
2  
3 In this paper, we present a further measure (the Sleep Condition Indicator:  
4 SCI) that may have some useful features. The SCI is informed by the development  
5 phase for DSM-5 insomnia disorder,<sup>7,8</sup> coupled with published research diagnostic  
6 criteria<sup>28</sup> and recommended quantitative parameters for sleep disturbance.<sup>29</sup> In  
7 keeping with DSM-5, the SCI also evaluates associated daytime factors, which are  
8 important drivers of clinical complaint<sup>21</sup> and should be incorporated in insomnia  
9 measurement.<sup>15,30</sup> In terms of utility, the SCI is brief but versatile. It yields a) a  
10 dimensional perspective on sleep quality: on an intuitive, global scale where higher  
11 scores represent better sleep; b) a visual profile of night-time and daytime symptoms  
12 that the clinician can use in consultations; and c) indicative cut-off points for clinically-  
13 significant Insomnia. This paper summarises the development and evaluation of the  
14 SCI across several studies, and in doing so addresses two major questions. First,  
15 does the SCI have adequate psychometric properties?; and second, is it possible to  
16 derive an even briefer, short-form, SCI that has similar psychometric characteristics?  
17  
18  
19  
20  
21  
22  
23  
24  
25  
26  
27  
28  
29  
30  
31  
32

## 33 **METHODS**

### 34 **Sample characteristics**

35  
36 Data are reported from five validation studies (total n=30,941; 71% Female) in which  
37 SCI items were administered. The Great British Sleep Survey (GBSS) was an open  
38 access, web-based survey completed by adults (18+yr.) with a UK postcode yielding  
39 data on 12,628 participants [72% Female; mean age = 38.7yr (SD = 14.5)] between  
40 February 2010 and August 2011.<sup>27</sup> The GBSS+ was a revision of the GBSS,  
41 extended to any valid zip code worldwide, from May 2011 to March 2012 (n=11,017;  
42 68% Female; 42.3yr (16.5)). The TV sample was obtained in response to a network  
43 programme (The Food Hospital, Channel 4) on the sleep benefits of tart cherry juice  
44 (n=6,876; 76% F, 36.4yr (13.3)). Glasgow Science Centre data (n=256; 56% Female,  
45 40.3yr (14.9)) were collected in 2009-2010 during a study which assessed the  
46 relationship between salivary alpha-amylase, sleep pressure and diurnal  
47  
48  
49  
50  
51  
52  
53  
54  
55  
56  
57  
58  
59  
60



1  
2  
3 preference.<sup>28</sup> Finally, an RCT sample comprised 164 participants (72% F, 48.9yr  
4 (13.7)] recruited into a placebo-controlled evaluation of CBT for insomnia.<sup>29</sup> Ethical  
5 agreement concerning the latter two studies are provided in the source manuscripts.  
6  
7 For the open access web surveys participation was covered by the site terms.  
8  
9

10  
11 Across our combined largest samples (GBSS, GBSS+, TV), women were  
12 slightly younger than men [38.5 (14.9) vs 40.1 (14.7) yrs;  $t(27638) = 7.94, p < .0001$ ]  
13 and the great majority was in average or better physical health (86%) and mental  
14 health (82%) [5-point scale: 0 'very good', 1 'good', 2 'average', 3 'poor', 4 'very  
15 poor']. Around 57% screened positive for possible Insomnia Disorder.<sup>31</sup> These are  
16 not prevalence data as we did not adopt a formal population sampling approach.  
17 Nevertheless, the inevitable bias of these open access surveys towards those with  
18 sleep concerns does permit us a) to profile many respondents, against criteria; b) to  
19 conduct powerful analyses of the properties of the SCI; and c) to make comparisons  
20 with sizeable cohorts of good sleepers. Respondents who made some use of  
21 prescription sleeping pills (9.1%) were 7 years older than those who did not [46.2  
22 (15.1) vs 39.1 (15.1)yr,  $t(20813) = 19.6, p < .0001$ ] and had a substantially poorer SCI  
23 score [8.56 (4.93) vs 15.6 (7.80),  $t(20813) = 38.8, p < .0001$ ]. Of the total sample,  
24 18.1% took over-the-counter sleep aids (OTCs), and more than one-third of those  
25 taking sleeping pills also used OTCs.  
26  
27  
28  
29  
30  
31  
32  
33  
34  
35  
36  
37  
38  
39  
40  
41  
42  
43

#### 44 **Design and Measurement**

45 This is a psychometric scale development study. Standard approaches to the  
46 appraisal of validity, reliability and sensitivity were applied, making appropriate  
47 selection amongst the available datasets. These methods and datasets will be  
48 introduced in an integrated way in subsequent sections, so that the research process  
49 can be more clearly expressed and understood.  
50  
51  
52  
53  
54  
55  
56  
57  
58  
59  
60

## RESULTS

### Development of the Sleep Condition Indicator (SCI)

#### *Content Validity*

An 8-item scale was developed (see Appendix) based upon DSM-5 workgroup draft criteria that were available at the time (in 2010).<sup>7,8</sup> At that stage, a consultation process was underway and draft information was posted on the APA website. Consequently, the SCI items generated comprised 2 quantitative items on sleep continuity [item 1: getting to sleep; item 2: remaining asleep], two qualitative items on sleep satisfaction/dissatisfaction [item 4: sleep quality; item 7: troubled or not], two quantitative items on severity [item 3: nights per week; item 8: duration of problem], and two qualitative items on attributed daytime consequences of poor sleep [item 5: effects on mood, energy, or relationships (personal functioning); item 6: effects on concentration, productivity, or ability to stay awake (daytime performance)].

Validated quantitative criteria for sleep disruption (e.g. 31-45 minutes to fall asleep) served as responses for sleep continuity items 1 and 2.<sup>8,28,29</sup> Items 5 and 6 on daytime effects were derived by Principal Components Analysis (PCA; Varimax rotation) of six individual proposed DSM-5 impact areas, using combined datasets (GBSS, GBSS+, TV, RCT: valid n= 29,650). PCA yielded satisfactory Kaiser-Meyer-Olkin (KMO=0.874) and Bartlett ( $p<.0001$ ) statistics. Iteration converged after 3 rotations. A two component model (derived from inspection of the scree plot and a criterion for associated variance  $\geq 10\%$ ) explained 75.8% of total variance, with item loadings  $\geq .60$ . Component 1 (Eigenvalue=3.83; 63.8% of variance) comprised 'mood' (loading = .812) 'energy' (.651) and 'relationships' (.859), and was subsequently named 'personal functioning'. Component 2 (Eigenvalue=0.72; 12.0% of variance) comprised 'concentration' (.719), 'get through work' (.724), and 'stay awake' (.875) may be regarded as 'daytime performance'. PCA offered a relatively pure solution, although 'energy' also loaded significantly on component 2 (.519).

1  
2  
3 We then investigated the inter-relationships of our 8 SCI items using the  
4 same methodology, but applying this time a minimum item loading of 0.40, to permit  
5 incorporation of all eight items. PCA with Varimax Rotation (KMO=0.888; Bartlett,  
6  $p < .0001$ ) yielded a two component solution (66.4% explained variance). Component  
7 1 (Eigenvalue=4.256, 53.2% variance), named 'sleep pattern' comprised items 1, 2,  
8 3, 4 and 8 with factor loading ranging from 0.453 to 0.776. Component 2  
9 (Eigenvalue=1.06, 13.2% variance), 'sleep-related impact' comprised item 5 (factor  
10 loading 0.886), and item 6 (0.911). Consistent with clinical presentation, concerns  
11 about sleep (item 7) loaded significantly, and similarly, on both 'sleep pattern' (0.616)  
12 and 'sleep-related impact' components (0.576).  
13  
14  
15  
16  
17  
18  
19  
20  
21  
22  
23  
24

#### 25 *Response format*

26 Each item was scored on a 5-point scale (0 - 4), with lower scores, in the 0 – 2 range,  
27 reflecting threshold criteria for Insomnia Disorder (shaded area: see Appendix). The  
28 clinician can then see at a glance the profile of possible concerns. Possible total  
29 score ranges from 0–32, with higher values indicative of better sleep. However,  
30 scores can be readily transformed into a more intuitive 0-10 SCI range, either by  
31 dividing the total by 3.2, or by using an online version with automated scoring, which  
32 is available free of charge ([www.sleepio.com/clinic/](http://www.sleepio.com/clinic/)).  
33  
34  
35  
36  
37  
38  
39  
40  
41  
42  
43

#### 44 *Concurrent Validity and association with related domains*

45 Data from the Science Centre sample demonstrated that the SCI correlates inversely  
46 with the PSQI ( $r = -.734$ ) and the ISI ( $r = -.793$ ), suggesting measurement properties  
47 consistent with these related measures. There was also a small but significant  
48 association of sleep condition with self-rated physical health ( $r = .222$ ), and an  
49 association also with mental health ( $r = .335$ ). Using more specific measures, in the  
50 Science Centre sample, correlation of the SCI with symptoms of depression ( $r = -.426$ )  
51 and anxiety ( $r = -.400$ ) on the Hospital Anxiety and Depression Scale<sup>34</sup> was modest,  
52  
53  
54  
55  
56  
57  
58  
59  
60

1  
2  
3 and greater than we observed in our RCT sample [on the Depression Anxiety Stress  
4 Scale<sup>35</sup>: depression ( $r=-.267$ ), anxiety ( $r=-.236$ ) and stress ( $r=-.263$ )].  
5  
6  
7

8  
9 We have not at this stage tested the discriminant validity of the SCI against clinical  
10 diagnosis of insomnia disorder. As a first step, however, using our Science Centre  
11 sample, we were able to compare the discriminant ability of SCI score  $\leq 16$ , reflecting  
12 minimum criteria for putative Insomnia Disorder (see appendix), with published ISI  
13 cut-off scores. We first categorized our sample according to ISI ranges (ISI score=0-  
14 14, reflecting “absence of insomnia” or “sub-threshold insomnia” [n=228] versus  
15 “moderate or severe insomnia” ISI score=15-28, n=27)<sup>36</sup> and conducted an  
16 independent *t*-test on SCI total score. Mean SCI values for the probable insomnia  
17 disorder category were 10.7 (SD=5.3) versus 22.9 (SD=6.2) for no insomnia disorder  
18 ( $t=9.86$ ,  $p<.0001$ ). Applying SCI cut-off  $\leq 16$ , 89% of the sample were correctly  
19 identified as having probable insomnia disorder (ISI scores of  $\geq 15$ ), while SCI score  
20 of  $>16$  correctly identified 82% of those with no insomnia disorder. These findings  
21 therefore suggest good discriminant validity for the SCI and help to confirm that a  
22 score of  $\leq 16$  on the SCI seems reasonable to detect possible insomnia disorder.  
23  
24  
25  
26  
27  
28  
29  
30  
31  
32  
33  
34  
35  
36  
37  
38  
39

#### 40 *Internal consistency*

41 Cronbach's  $\alpha$  for the GBSS sample was strong at 0.857 (range of  *$\alpha$ -if-item-deleted*  
42 0.822-0.860). Replication of these internal consistency data was obtained from the  
43 GBSS+ sample ( $\alpha=0.865$ ). Mean corrected item-total correlation was moderate  
44 ( $r=0.620$ ) indicating substantial unique variance per item (shared variance = 38%).  
45  
46  
47  
48  
49  
50

#### 51 *Sensitivity to change*

52 We have previously reported that the SCI is sensitive as a measure of treatment  
53 outcome.<sup>33</sup>  
54  
55  
56  
57  
58  
59  
60

### Short-form version of the SCI

Although the SCI is brief, in clinical practice ultra short-form scales is often helpful (e.g. GAD-2).<sup>37</sup> Accordingly, we conducted a linear regression analysis to determine which subset of items (independent variables) explained the greatest proportion of variance in the dependent variable, SCI total score. A two-item (SCI-02), comprising item 3 ‘...how many nights’ (standardized  $\beta = .515$ ) and item 8 ‘... troubled you in general’ ( $\beta = .491$ ) together predicted 82% of variance (Adjusted  $R^2 = .820$ ) in the full scale SCI [ $R^2$  change =  $.672 + .148$ ;  $F(2,27637) = 62770$ ,  $p < .0001$ ]. As a check on the independence of residuals we computed the Durbin-Watson statistic, which was found to be 1.80, suggesting no serial correlation. The SCI-02 also correlated strongly with the SCI score total ( $r = .904$ ).

### DISCUSSION

Pre-requisite to improved insomnia care is the availability and regular use of reliable and valid insomnia assessment. Only then can a clinical problem be recognised as distinct from normal variation, and a persistent problem be differentiated from a transient one. We have reported here the development and preliminary validation of the SCI; a DSM-5 compliant, brief screening measure that may be fit for such purposes. Results indicate that the SCI is internally consistent, sensitive to change, and correlates strongly with established screening instruments, known to be sensitive to clinical insomnia (PSQI and ISI). Principal components analysis revealed a 2-component solution (66% of the variance), reflecting the underlying complaint of insomnia; that is, concerns about sleep pattern and concerns about the impact of poor sleep, both of which need to be addressed in clinical practice. The derived 2-item short-form version, focusing on the severity of the presenting complaint coupled with frequency of the sleep problem, correlated

1  
2  
3 strongly with total SCI score and we would suggest that these might be the lead  
4 questions for a clinician to use in the context of their consulting room practice.  
5

6  
7 Of course, further work is required, particularly real world studies of how the  
8 SCI might be used in population screening and in the evaluation of outcome following  
9 an episode of care. While comparisons with ISI cut-offs suggest good discriminant  
10 ability of the SCI to detect probable insomnia disorder (score  $\leq 16$ ), studies of  
11 predictive validity with reference to independent clinical evaluation of Insomnia  
12 Disorder are essential before firm conclusions can be made. Furthermore, it should  
13 be noted that the SCI does not contain specific questions relating to early morning  
14 awakenings (EMA; premature awakening with inability to return to sleep) – a  
15 symptom which has recently been incorporated into DSM-5 criteria. While  
16 established insomnia questionnaires, including the ISI<sup>27</sup> and Athens Insomnia Scale<sup>37</sup>  
17 probe perceived severity of EMA,, quantitative values for EMA, to our knowledge, are  
18 yet to be defined. To some extent, SCI item 2 on wakefulness during the night may  
19 capture this complaint, but we recommend that the clinician follows-up a 'positive'  
20 answer to locate the nature and temporal position of wakefulness during the sleep  
21 period. Moreover, other core DSM-5 criteria do not feature as SCI items (e.g. the  
22 sleep difficulty occurs despite adequate opportunity for sleep; the insomnia is not  
23 better explained by and does not occur exclusively during the course of another  
24 sleep-wake disorder; and the insomnia is not attributable to the physiological effects  
25 of a substance). However, these items are not easy to probe unambiguously with a  
26 self-completed psychometric instrument and would require careful scrutiny by a  
27 treating clinician. Thus, the SCI should be viewed as a screening tool, consistent with  
28 features of DSM-5, but requiring careful follow-up in clinical practice.  
29  
30  
31  
32  
33  
34  
35  
36  
37  
38  
39  
40  
41  
42  
43  
44  
45  
46  
47  
48  
49  
50  
51  
52  
53  
54  
55  
56  
57  
58  
59  
60

## CONTRIBUTORSHIP STATEMENT

All authors engaged in the following study tasks: 1) substantial contributions to conception and design, acquisition of data, or analysis and interpretation of data; 2) drafting the article or revising it critically for important intellectual content; and 3) final approval of the version to be published

## DATA SHARING STATEMENT

N/A

## COMPETING INTERESTS

All authors have completed the ICMJE uniform disclosure form and declare: CE is Clinical and Scientific Director of Sleepio Ltd. and PH is co-founder, shareholder and board member of Sleepio Ltd. SK has acted as a consultant for Sleepio Ltd.

## REFERENCES

1. Singleton N, Bumpstead R, O'Brien M, et al. Psychiatric morbidity among adults living in private households, 2000. London: The Office for National Statistics, HMSO; 2001.
2. Morin CM, Benca R. Chronic insomnia. *Lancet* 2012;379(9821):1129-41.
3. Falloon K, Arroll B, Elley CR, et al. The assessment and management of insomnia in primary care. *BMJ* 2011; 342: d2899.
4. Lichstein K. Secondary insomnia: A myth dismissed. *Sleep Med Rev* 2006; 10: 3-5.
5. Stores G, Crawford C. Medical student education in sleep and its disorders. *J Royal College Physicians London* 1998; 32:149-153.

- 1  
2  
3 6. Harvey AG. Insomnia: Symptom or diagnosis? *Clinical Psychology Review*  
4 2001;21:1037-1059.  
5
- 6  
7 7. Reynolds CF, Redline S. The DSM-V sleep-wake disorders nosology: An  
8 update and an invitation to the sleep community. *J Clin Sleep Med* 2010;15:9-  
9 10.  
10
- 11  
12 8. American Psychiatric Association. M00 Insomnia Disorder. DSM-5  
13 Development Web site.  
14 <http://www.dsm5.org/ProposedRevision/Pages/proposedrevision.aspx?rid=65#>  
15 / Updated June 2, 2010.  
16
- 17  
18 9. American Psychiatric Association. *Diagnostic and statistical manual of mental*  
19 *disorders* (5th ed.). Arlington, VA, 2013.  
20
- 21  
22 10. Morin CM, Belanger L, LeBlanc M, et al. The natural history of insomnia: A  
23 population-based 3-year longitudinal study. *Archives of internal Medicine*  
24 2009; 169:447-453.  
25
- 26  
27 11. Green, M., Benzeval, M., Espie, C.A., Hunt, K. The longitudinal course of  
28 insomnia symptoms: inequalities by gender and occupational class among  
29 two different age cohorts followed for 20 years in the West of Scotland.  
30 *SLEEP* 2012;35:385-393.  
31
- 32  
33 12. Vgontzas AN, Liao D, Bixler EO, et al. Insomnia with objective short sleep  
34 duration is associated with a high risk for hypertension *Sleep* 2009;32:491-7.  
35
- 36  
37 13. Vgontzas AN, Liao D, Pejovic S, et al. Insomnia with objective short sleep  
38 duration is associated with type 2 diabetes: a population-based Study.  
39 *Diabetes Care* 2009;32:1980-5.  
40
- 41  
42 14. Baglioni C, Battagliese G, Feige B, et al. Insomnia as a predictor of  
43 depression: A meta-analytic evaluation of longitudinal epidemiological  
44 studies. *J Affect Disord* 2011;135:10-19.  
45
- 46  
47 15. Kyle SD, Morgan K, Espie C. Insomnia and health-related quality of life. *Sleep*  
48 *Med Rev* 2010;14; 69-82.  
49  
50  
51  
52  
53  
54  
55  
56  
57  
58  
59  
60



- 1  
2  
3 16. Sivertsen B, Overland S, Neckelman D, et al. The long-term effect of  
4 insomnia on work disability: The HUNT-2 historical cohort study. *Am J*  
5 *Epidemiol* 2006;163:1018-1024.  
6  
7  
8  
9 17. Leger D, Bayon V. Societal costs of insomnia. *Sleep Med Rev* 2010;14:379-  
10 389.  
11  
12  
13 18. Morin CM, Bootzin RR, Buysse DJ, et al. Psychological and behavioral  
14 treatment of insomnia: Update of the recent evidence (1998-2004). *Sleep*  
15 *2006;29:1398-414.*  
16  
17  
18  
19 19. Riemann D, Perlis ML. The treatments of chronic insomnia: A review of  
20 benzodiazepine receptor agonists and psychological and behavioral  
21 therapies. *Sleep Med Rev* 2009;13:205-214.  
22  
23  
24  
25 20. Espie, C.A. 'Stepped care': a health technology solution for delivering  
26 Cognitive Behavioral Therapy as a first line insomnia treatment. *Sleep*  
27 *2009;32:1549-1558.*  
28  
29  
30  
31 21. Morin CM, LeBlanc M, Daley JP, et al.. Epidemiology of insomnia:  
32 Prevalence, self-help treatments, consultations, and determinants of help-  
33 seeking behaviors. *Sleep Med* 2006; 7: 123-130.  
34  
35  
36  
37 22. NICE Clinical Guideline 123. Common mental health disorders: Identification  
38 and pathways to care. 2011.  
39  
40  
41 <http://www.nice.org.uk/nicemedia/live/13476/54520/54520.pdf>  
42  
43  
44 23. Kroenke, K., Spitzer, R.L. and Williams, J.B. (2001). The PHQ-9: Validity of a  
45 brief depression severity measure. *Journal of General Internal Medicine,*  
46 *16:606–613.*  
47  
48  
49 24. Spitzer, R,L,, Kroenke, K., Williams, J.B.W. et al. (2006). A brief measure for  
50 assessing generalized anxiety disorder: The GAD-7. *Archives of Internal*  
51 *Medicine, 166:1092–1097*  
52  
53  
54  
55  
56  
57  
58  
59  
60

- 1  
2  
3 25. Bush, K., Kivlahan, D.R., McDonnell, M.B. et al. The AUDIT alcohol  
4 consumption questions (AUDIT-C): An effective brief screening test for  
5 problem drinking. Arch Intern Med 1998; 158; 1789-1795.  
6  
7  
8  
9 26. Buysse DJ, Reynolds III CF, Monk TH, et al. The Pittsburgh Sleep Quality  
10 Index: a new instrument for psychiatric practice and research. Psych Res  
11 1989; 28: 193–213.  
12  
13 27. Morin C.M. Insomnia: Psychological assessment and management. 1993.  
14 New York: Guilford.  
15  
16 28. Edinger JD, Bonnet MH, Bootzin RR, et al. Derivation of research diagnostic  
17 criteria for insomnia: Report of an American Academy of Sleep Medicine  
18 Work Group. Sleep. 2004;27:1567-96.  
19  
20 29. Lichstein KL, Durrence HH, Taylor DJ, et al. Quantitative criteria for insomnia.  
21 Behav Res Ther 2003;41:427-445.  
22  
23 30. Moul DE, Hall M, Pilkonis PA, et al. Self-report measures of insomnia in  
24 adults: rationales, choices, and needs. Sleep Med Rev 2004; 8: 177-198.  
25  
26 31. Espie CA, Kyle SD, Hames P, et al. The daytime impact of DSM-5 Insomnia  
27 Disorder: comparative analysis of insomnia subtypes from the Great British  
28 Sleep Survey (n=11,129). J Clin Psychiatry 73(12):e1478-1484  
29  
30 32. Gardani M, Miller CB, Biello S, ~~Ellis J, Von Schantz M, Archer Set al.~~ The  
31 association of sleepiness and diurnal preference with salivary amylase  
32 activity. Abstracts of 4th International Congress of WASM & 5th Conference  
33 of CSS / Sleep Medicine 12, Suppl. 1 (2011) S1–S130.  
34  
35 33. Espie CA, Kyle SD, Williams C, et al. A randomized, placebo-controlled, trial  
36 of online Cognitive Behavioral Therapy for chronic Insomnia Disorder  
37 delivered via an automated media-rich web application. Sleep 2012; 35: 769-  
38 781.  
39  
40 34. Zigmond AS, Snaith RP. The hospital anxiety and depression scale. Acta  
41 Psychiatrica Scandinavica 1983; 67: 361-370.  
42  
43  
44  
45  
46  
47  
48  
49  
50  
51  
52  
53  
54  
55  
56  
57  
58  
59  
60

- 1  
2  
3 35. Henry JD, Crawford JR. The short-form version of the Depression Anxiety  
4 Stress Scales (DASS-21): Construct validity and normative data in a large  
5 non-clinical sample, Br J Clin Psychol 2005;44:227-239.  
6  
7  
8  
9 36. Morin CM, Belleville G, Belanger L, ~~Ivers-Het al.~~ The Insomnia Severity Index:  
10 Psychometric indicators to detect insomnia cases and evaluate treatment  
11 response. SLEEP 2011;34:601-608.  
12  
13  
14 37. Soldatos CR, Dikeos DG, Paprriopoulos TJ. Athens insomnia scale:  
15 validation of an instrument based on ICD-10 criteria. J Psychosom Res  
16 2000;48:555-560.  
17  
18  
19  
20  
21  
22  
23  
24  
25  
26  
27  
28  
29  
30  
31  
32  
33  
34  
35  
36  
37  
38  
39  
40  
41  
42  
43  
44  
45  
46  
47  
48  
49  
50  
51  
52  
53  
54  
55  
56  
57  
58  
59  
60

## Appendix: The Sleep Condition Indicator

| Item                                                                                                                | Score                           |             |             |             |           |
|---------------------------------------------------------------------------------------------------------------------|---------------------------------|-------------|-------------|-------------|-----------|
|                                                                                                                     | 4                               | 3           | 2           | 1           | 0         |
| <b>Thinking about a typical night in the last month ...</b>                                                         |                                 |             |             |             |           |
| 1. ... how long does it take you to fall asleep?                                                                    | 0 – 15 min                      | 16 – 30 min | 31 – 45 min | 46 – 60 min | ≥ 61 min  |
| 2. ... if you then wake up during the night ... how long are you awake for in total?<br>(add all the awakenings up) | 0 – 15 min                      | 16 – 30 min | 31 – 45 min | 46 – 60 min | ≥ 61 min  |
| 3. ... how many nights a week do you have a problem with your sleep?                                                | 0 - 1                           | 2           | 3           | 4           | 5 - 7     |
| 4. ... how would you rate your sleep quality?                                                                       | Very good                       | Good        | Average     | Poor        | Very poor |
| <b>Thinking about the past month, to what extent has poor sleep ...</b>                                             |                                 |             |             |             |           |
| 5. ... affected your mood, energy, or relationships?                                                                | Not at all                      | A little    | Somewhat    | Much        | Very much |
| 6. ... affected your concentration, productivity, or ability to stay awake                                          | Not at all                      | A little    | Somewhat    | Much        | Very much |
| 7. ... troubled you in general                                                                                      | Not at all                      | A little    | Somewhat    | Much        | Very much |
| <b>Finally ...</b>                                                                                                  |                                 |             |             |             |           |
| 8. ... how long have you had a problem with your sleep?                                                             | I don't have a problem / < 1 mo | 1 – 2 mo    | 3 – 6 mo    | 7 – 12 mo   | > 1 yr    |

## Scoring instructions:

- Add the item scores to obtain the SCI total (minimum 0, maximum 32)
- A higher score means better sleep
- Scores can be converted to 0 – 10 format (minimum 0, maximum 10) by dividing total by 3.2
- Item scores in grey area represent threshold criteria for Insomnia Disorder

A free online version, with built-in score convertor can be found at [www.sleepio.com/clinic](http://www.sleepio.com/clinic)

The Sleep Condition Indicator: a clinical screening tool to evaluate  
Insomnia Disorder

Colin A. Espie, PhD<sup>1,3</sup>, Simon D. Kyle, PhD<sup>2</sup>, Peter Hames, MA Oxon<sup>3</sup>, Maria Gardani, PhD<sup>4</sup>, Leanne Fleming, PhD<sup>4</sup>, John Cape, PhD<sup>5</sup>

<sup>1</sup> Nuffield Department of Clinical Neurosciences/ Sleep & Circadian Neuroscience Institute, University of Oxford, UK  
*Colin A. Espie, Professor*

<sup>2</sup> School of Psychological Sciences, University of Manchester, UK  
*Simon D. Kyle, Lecturer*

<sup>3</sup> Sleepio Limited, London, UK  
*Peter Hames, co-founder*

<sup>4</sup> Institute of Health & Wellbeing, University of Glasgow, UK  
*Maria Gardani, Research Fellow, Leanne Fleming, Research Fellow*

<sup>5</sup> Camden & Islington NHS Trust, London, UK  
*John Cape, Professor & Head of Psychological Therapies*

Corresponding Author:

Colin A. Espie, Nuffield Department of Clinical Neurosciences/ Sleep & Circadian Neuroscience Institute, University of Oxford, Level 6, West Wing, John Radcliffe Hospital, Oxford, OX3 9DU, UK.

Key words: insomnia, assessment, patient outcomes, DSM-5, psychometric, scale

**ABSTRACT**

*Objective:* Describe the development and psychometric validation of a brief scale [The Sleep Condition Indicator (SCI)] to evaluate Insomnia Disorder in everyday clinical practice.

*Design:* The SCI was evaluated across five studies, including large scale surveys and a placebo-controlled trial of Cognitive Behavioural Therapy (CBT) for insomnia. Content validity, internal consistency, ~~sensitivity and specificity~~, concurrent validity, and responsiveness to change were investigated.

*Participants:* 30,941 individuals (71% female) completed the SCI along with other descriptive demographic and clinical information.

*Setting:* Data acquired on dedicated web-sites.

*Results:* The 8-item SCI (concerns about getting to sleep, remaining asleep, sleep quality, daytime personal functioning, daytime performance, duration of sleep problem, nights per week having a sleep problem, and extent troubled by poor sleep) had robust internal consistency ( $\alpha \geq 0.86$ ) and showed convergent validity with the Pittsburgh Sleep Quality Index and Insomnia Severity Index. ~~and 92% sensitivity (SCI score  $\leq 4.6$ ) / 87% specificity (SCI score  $>15$ ) for Insomnia Disorder.~~ Sensitivity to treatment outcome using CBT (relative) to placebo was demonstrated in a randomised trial ( $d=0.95$ ). A 2-item short-form (SCI-02: nights per week having a sleep problem, extent troubled by poor sleep), derived using linear logistic regression modelling, correlated strongly with the SCI total score ( $r=.90$ ).

*Conclusions:* The SCI has potential as a clinical screening tool for appraising insomnia complaints against DSM-5 criteria.

### **STRENGTHS AND LIMITATIONS**

- Existing instruments used to evaluate insomnia lack specificity or do not permit assessment against the latest diagnostic criteria. This study describes the development and validation of a new instrument (the sleep condition indicator) for use in everyday clinical practice. The SCI is valid, reliable and sensitive to change in insomnia severity. Its brevity and appealing visual format permit rapid assessment and interpretation of poor sleep, against contemporary clinical diagnostic criteria.
- While we have used large surveys and treatment evaluation to assess SCI properties, more work is required to assess predictive validity with reference to independent clinical evaluation of Insomnia Disorder.

## INTRODUCTION

Although insomnia is the most common of all mental health complaints,<sup>1</sup> it is seldom adequately assessed and **treatment services** are often poor.<sup>2,3</sup> This perhaps reflects the perspective that insomnia is usually a symptom,<sup>4</sup> coupled with minimal medical education on sleep and its disorders.<sup>5</sup> However, there are three reasons why this perspective must now change. First, insomnia is not merely a symptom. **It has for some time been proposed as a genuine diagnosis (see Harvey review),<sup>6</sup> and recently the DSM-5 Workgroup recognised that the previous dichotomy of primary versus secondary insomnia is not evidence-based.<sup>7,8</sup> Accordingly, DSM-5 now recommends** that 'Insomnia Disorder' should be coded "*whenever diagnostic criteria are met whether or not there is a co-existing physical, mental or sleep disorder*".<sup>9</sup> Second, insomnia is not necessarily transient or benign. Once established, it is remarkably persistent,<sup>10,11</sup> constituting a risk factor for the development of physical and mental health problems, notably depression,<sup>12-14</sup> as well as adverse effects upon quality of life.<sup>15</sup> **Chronic insomnia is also associated with high societal cost,<sup>16</sup> and is, for example, a robust predictor of work disability.<sup>17</sup>** Third, insomnia is treatable. There is a very substantial level 1 evidence-base, evaluating pharmacological and cognitive-behavioural therapies (CBT),<sup>18,19</sup> although the latter are very seldom available.<sup>3,20</sup>

Insomnia is ubiquitous<sup>21</sup> so it is important that clinicians, GPs in particular, have a reliable, valid, and brief, screening tool. A wide range of such instruments is a standard part of patient-centred care,<sup>22</sup> for example, for depression,<sup>23</sup> anxiety<sup>24</sup> and alcohol problems.<sup>25</sup> In the insomnia field, two scales in particular are widely used: the Pittsburgh Sleep Quality Index (PSQI)<sup>26</sup> and the Insomnia Severity Index (ISI).<sup>27</sup> The PSQI is a an established research tool, which has a cut-off score indicative of sleep disturbance. However, it lacks specificity for insomnia. The ISI is very sound psychometrically, and is more specific and based on DSM-IV criteria for insomnia. It is used in the main to select people for clinical trials and as an outcome measure.



1  
2  
3  
4  
5  
6 In this paper, we present a further measure (the Sleep Condition Indicator:  
7 SCI) that may have some useful features. The SCI is informed by the development  
8 phase for DSM-5 insomnia disorder,<sup>7,8</sup> coupled with published research diagnostic  
9 criteria<sup>28</sup> and recommended quantitative parameters for sleep disturbance.<sup>29</sup> In  
10 keeping with DSM-5, the SCI also evaluates associated daytime factors, which are  
11 important drivers of clinical complaint<sup>21</sup> and should be incorporated in insomnia  
12 measurement.<sup>15,30</sup> In terms of utility, the SCI is brief but versatile. It yields a)  
13 a dimensional perspective on sleep quality: on an intuitive, global scale where higher  
14 scores represent better sleep; b) a visual profile of night-time and daytime symptoms  
15 that the clinician can use in consultations; and c) indicative cut-off points for clinically-  
16 significant Insomnia—Disorder. This paper summarises the development and  
17 evaluation of the SCI across several studies, and in doing so addresses two major  
18 questions. First, does the SCI have adequate psychometric properties?; and second,  
19 is it possible to derive an even briefer, short-form, SCI that has similar psychometric  
20 characteristics?  
21  
22  
23  
24  
25  
26  
27  
28  
29  
30  
31  
32  
33  
34

## 35 METHODS

### 36 Sample characteristics

37 Data are reported from five validation studies (total n=30,941; 71% Female) in which  
38 SCI items were administered. The Great British Sleep Survey (GBSS) was an open  
39 access, web-based survey completed by adults (18+yr.) with a UK postcode yielding  
40 data on 12,628 participants [72% Female; mean age = 38.7yr (SD = 14.5)] between  
41 February 2010 and August 2011.<sup>27</sup> The GBSS+ was a revision of the GBSS,  
42 extended to any valid zip code worldwide, from May 2011 to March 2012 (n=11,017;  
43 68% Female; 42.3yr (16.5)]. The TV sample was obtained in response to a network  
44 programme (The Food Hospital, Channel 4) on the sleep benefits of tart cherry juice  
45 (n=6,876; 76% F, 36.4yr (13.3)]. Glasgow Science Centre data (n=256; 56% Female,  
46 40.3yr (14.9)) were collected in 2009-2010 during a study which assessed the  
47  
48  
49  
50  
51  
52  
53  
54  
55

1  
2  
3  
4  
5  
6 relationship between salivary alpha-amylase, sleep pressure and diurnal  
7 preference.<sup>28</sup> Finally, an RCT sample comprised 164 participants (72% F, 48.9yr  
8 (13.7)] recruited into a placebo-controlled evaluation of CBT for insomnia.<sup>29</sup> Ethical  
9 agreement concerning the latter two studies are provided in the source manuscripts.  
10 For the open access web surveys participation was covered by the site terms.  
11  
12  
13  
14

15 Across our combined largest samples (GBSS, GBSS+, TV), women were  
16 slightly younger than men [38.5 (14.9) vs 40.1 (14.7) yrs;  $t(27638) = 7.94, p < .0001$ ]  
17 and the great majority was in average or better physical health (86%) and mental  
18 health (82%) [5-point scale: 0 'very good', 1 'good', 2 'average', 3 'poor', 4 'very  
19 poor']. Around 57% screened positive for possible Insomnia Disorder.<sup>31</sup> These are  
20 not prevalence data as we did not adopt a formal population sampling approach.  
21 Nevertheless, the inevitable bias of these open access surveys towards those with  
22 sleep concerns does permit us a) to profile many respondents, against criteria; b) to  
23 conduct powerful analyses of the properties of the SCI; and c) to make comparisons  
24 with sizeable cohorts of good sleepers. Respondents who made some use of  
25 prescription sleeping pills (9.1%) were 7 years older than those who did not [46.2  
26 (15.1) vs 39.1 (15.1)yr,  $t(20813) = 19.6, p < .0001$ ] and had a substantially poorer SCI  
27 score [8.56\_(4.93) vs 15.6 (7.80),  $t(20813) = 38.8, p < .0001$ ]. Of the total sample,  
28 18.1% took over-the-counter sleep aids (OTCs), and more than one-third of those  
29 taking sleeping pills also used OTCs.  
30  
31  
32  
33  
34  
35  
36  
37  
38  
39  
40  
41  
42  
43

#### 44 **Design and Measurement**

45 This is a psychometric scale development study. Standard approaches to the  
46 appraisal of validity, reliability and sensitivity were applied, making appropriate  
47 selection amongst the available datasets. These methods and datasets will be  
48 introduced in an integrated way in subsequent sections, so that the research process  
49 can be more clearly expressed and understood.  
50  
51  
52  
53  
54

## RESULTS

### Development of the Sleep Condition Indicator (SCI)

#### *Content Validity*

An 8-item scale was developed (see Appendix) based upon DSM-5 workgroup draft criteria that were available at the time (in 2010).<sup>7,8</sup> At that stage, a consultation process was underway and draft information was posted on the APA website. Consequently, the SCI items generated comprised 2 quantitative items on sleep continuity [item 1: getting to sleep; item 2: remaining asleep], two qualitative items on sleep satisfaction/dissatisfaction [item 4: sleep quality; item 7: troubled or not], two quantitative items on severity [item 3: nights per week; item 8: duration of problem], and two qualitative items on attributed daytime consequences of poor sleep [item 5: effects on mood, energy, or relationships (personal functioning); item 6: effects on concentration, productivity, or ability to stay awake (daytime performance)].

Validated quantitative criteria for sleep disruption (e.g. 31-45 minutes to fall asleep) served as responses for sleep continuity items 1 and 2.<sup>8,28,29</sup> Items 5 and 6 on daytime effects were derived by Principal Components Analysis (PCA; Varimax rotation) of six individual proposed DSM-5 impact areas, using combined datasets (GBSS, GBSS+, TV, RCT: valid n= 29,650). PCA yielded satisfactory Kaiser-Meyer-Olkin (KMO=0.874) and Bartlett ( $p<.0001$ ) statistics. Iteration converged after 3 rotations. A two component model (derived from inspection of the scree plot and a criterion for associated variance  $\geq 10\%$ ) explained 75.8% of total variance, with item loadings  $\geq .60$ . Component 1 (Eigenvalue=3.83; 63.8% of variance) comprised 'mood' (loading = .812) 'energy' (.651) and 'relationships' (.859), and was subsequently named 'personal functioning'. Component 2 (Eigenvalue=0.72; 12.0% of variance) comprised 'concentration' (.719), 'get through work' (.724), and 'stay awake' (.875) may be regarded as 'daytime performance'. PCA offered a relatively pure solution, although 'energy' also loaded significantly on component 2 (.519).

1  
2  
3  
4  
5  
6 We then investigated the inter-relationships of our 8 SCI items using the  
7 same methodology, but applying this time a minimum item loading of 0.40, to permit  
8 incorporation of all eight items. PCA with Varimax Rotation (KMO=0.888; Bartlett,  
9  $p < .0001$ ) yielded a two component solution (66.4% explained variance). Component  
10 1 (Eigenvalue=4.256, 53.2% variance), named 'sleep pattern' comprised items 1, 2,  
11 3, 4 and 8 with factor loading ranging from 0.453 to 0.776. Component 2  
12 (Eigenvalue=1.06, 13.2% variance), 'sleep-related impact' comprised item 5 (factor  
13 loading 0.886), and item 6 (0.911). Consistent with clinical presentation, concerns  
14 about sleep (item 7) loaded significantly, and similarly, on both 'sleep pattern' (0.616)  
15 and 'sleep-related impact' components (0.576).  
16  
17  
18  
19  
20  
21  
22  
23

#### 24 25 26 *Response format*

27 Each item was scored on a 5-point scale (0 - 4), with lower scores, in the 0 – 2 range,  
28 reflecting threshold criteria for Insomnia Disorder (shaded area: see Appendix). The  
29 clinician can then see at a glance the profile of possible concerns. Possible total  
30 score ranges from 0–32, with higher values indicative of better sleep. However,  
31 scores can be readily transformed into a more intuitive 0-10 SCI range, either by  
32 dividing the total by 3.2, or by using an online version with automated scoring, which  
33 is available free of charge ([www.sleepio.com/clinic/](http://www.sleepio.com/clinic/)).  
34  
35  
36  
37  
38  
39  
40  
41

#### 42 43 *Concurrent Validity and association with related domains*

44 Data from the Science Centre sample demonstrated that the SCI correlates inversely  
45 with the PSQI ( $r = -.734$ ) and the ISI ( $r = -.793$ ), suggesting measurement properties  
46 consistent with these related measures. There was also a small but significant  
47 association of sleep condition with self-rated physical health ( $r = .222$ ), and an  
48 association also with mental health ( $r = .335$ ). Using more specific measures, in the  
49 Science Centre sample, correlation of the SCI with symptoms of depression ( $r = -.426$ )  
50 and anxiety ( $r = -.400$ ) on the Hospital Anxiety and Depression Scale<sup>34</sup> was modest,  
51  
52  
53  
54  
55  
56

and greater than we observed in our RCT sample [on the Depression Anxiety Stress Scale<sup>35</sup>: depression ( $r=-.267$ ), anxiety ( $r=-.236$ ) and stress ( $r=-.263$ )].

#### Sensitivity/ Specificity of SCI

We have not at this stage tested the discriminant validity of the SCI against clinical diagnosis of insomnia disorder. As a first step, however, ~~we have used our GBSS dataset to propose possible thresholds for insomnia. Applying cut offs of  $SCI \leq 15$  (on the 0-32 scaled version) and  $SCI \leq 4.6$  (on the 0-10 scaled version) correctly identified 92% of people scoring positive against the DSM-5 draft criteria (sensitivity),<sup>34</sup> whereas  $SCI > 16$  and  $SCI > 4.6$ , respectively, correctly identified 87% of individuals who would appear not to meet these criteria.~~ Using our Science Centre sample, we were able to compare the discriminant ability of SCI score  $\leq 16$ , reflecting minimum criteria for putative Insomnia Disorder (see appendix), these cut offs with published ISI cut-off scores. We first categorized our sample according to ISI ranges (ISI score=0-14, reflecting “absence of insomnia” or “sub-threshold insomnia” [n=228] versus “moderate or severe insomnia” ISI score=15-28, n=27)]<sup>36</sup> and conducted an independent *t*-test on SCI total score. Mean SCI values for the probable insomnia disorder category were 10.7 (SD=5.3) versus 22.9 (SD=6.2) for no insomnia disorder ( $t=9.86$ ,  $p<.0001$ ). Applying SCI cut-off  $\leq 16$ , 89% of the sample were correctly identified as having probable insomnia disorder (ISI scores of  $\geq 15$ ), while SCI score of  $> 16$  correctly identified 82% of those with no insomnia disorder. These findings therefore suggest good discriminant validity for the SCI and help to confirm that a score of  $\leq 16$  on the SCI seems reasonable to detect possible insomnia disorder.

#### *Internal consistency*

Cronbach's  $\alpha$  for the GBSS sample was strong at 0.857 (range of  *$\alpha$ -if-item-deleted* 0.822-0.860). Replication of these internal consistency data was obtained from the

1  
2  
3  
4  
5  
6 GBSS+ sample ( $\alpha=0.865$ ). Mean corrected item-total correlation was moderate  
7 ( $r=0.620$ ) indicating substantial unique variance per item (shared variance = 38%).  
8  
9

### 10 11 *Sensitivity to change*

12  
13 We have previously reported that the SCI is sensitive as a measure of treatment  
14 outcome.<sup>33</sup>  
15  
16

### 17 18 **Short-form version of the SCI**

19  
20 Although the SCI is brief, in clinical practice ultra short-form scales is often helpful  
21 (e.g. GAD-2).<sup>37</sup> Accordingly, we conducted a linear regression analysis to determine  
22 which subset of items (independent variables) explained the greatest proportion of  
23 variance in the dependent variable, SCI total score. A two-item (SCI-02), comprising  
24 item 3 '...how many nights' (standardized  $\beta = .515$ ) and item 8 '... troubled you in  
25 general' ( $\beta = .491$ ) together predicted 82% of variance (Adjusted  $R^2 = .820$ ) in the full  
26 scale SCI [ $R^2$  change =  $.672 + .148$ ;  $F(2,27637) = 62770$ ,  $p < .0001$ ]. As a check on  
27 the independence of residuals we computed the Durbin-Watson statistic, which was  
28 found to be 1.80, suggesting no serial correlation. The SCI-02 also correlated  
29 strongly with the SCI score total ( $r = .904$ ).  
30  
31  
32  
33  
34  
35  
36  
37

38 ~~Applying ROC analyses, SCI-02  $\leq 3$  (on the 0-8 scaled version) correctly identified~~  
39 ~~87% of people scoring positive for ID (sensitivity), whereas SCI-02  $> 3$  correctly~~  
40 ~~identified 91% of individuals who did not meet draft DSM-5 criteria.~~  
41  
42  
43  
44  
45

### 46 47 **DISCUSSION**

48  
49 ~~Neither patients nor physicians quite know what to do about insomnia.<sup>38</sup> It is a~~  
50 ~~common subjective complaint, difficult to evaluate, and with no clear pathway for its~~  
51 ~~management.<sup>3,16,17</sup> Despite the majority being unsure whether or not to mention it to~~  
52 ~~their doctor,<sup>39</sup> twelve million prescriptions are written annually in the UK,<sup>40</sup> to doubtful~~  
53  
54  
55  
56  
57  
58  
59  
60

benefit.<sup>41-43</sup> ~~If insomnia were simply a transient blemish then all this might not matter. However, consistent with the fact that sleep, like oxygen, water and food, is crucial to effective functioning,<sup>44</sup> there is mounting evidence that poor sleep often becomes persistent,<sup>40,41</sup> and that persistent insomnia is detrimental to health and wellbeing.<sup>42-45</sup>~~

Pre-requisite to improved insomnia care is the availability and regular use of reliable and valid insomnia assessment. Only then can a clinical problem be recognised as distinct from normal variation, and a persistent problem be differentiated from a transient one. We have reported here the development and preliminary validation of the SCI; a DSM-5 compliant, brief screening measure that may be fit for such purposes. Results indicate that the SCI is internally consistent, sensitive to change, and correlates strongly with established screening instruments, known to be sensitive to clinical insomnia (PSQI and ISI). Principal components analysis revealed a 2-component solution (66% of the variance). Importantly, the SCI items reflecting the underlying complaint of insomnia; that is, concerns about sleep pattern and concerns about the impact of poor sleep, both of which need to be addressed in clinical practice. ~~The SCI, at 8 items, is simple and quick to complete and, based on several sizable studies, it has very promising psychometric characteristics.~~ The derived 2-item short-form version, focuses upon the severity of the presenting complaint coupled with frequency of the sleep problem, correlated strongly with total SCI score and we would suggest that these might be the lead questions for a clinician to use in the context of their consulting room practice.

Of course, further work is required, particularly real world studies of how the SCI might be used in population screening and in the evaluation of outcome following an episode of care. ~~While comparisons with ISI cut-offs suggest good discriminant ability of the SCI to detect probable insomnia disorder (score  $\leq 16$ ), s~~ Studies of predictive validity with reference to independent clinical evaluation of Insomnia Disorder ~~are essential-necessary before firm conclusions can be made~~ would be welcome. Furthermore, Finally, it should be noted that the SCI does not contain

1  
2  
3  
4  
5  
6 specific questions relating to early morning awakenings (EMA; premature awakening  
7 with inability to return to sleep) – a symptom which has recently been incorporated  
8 into DSM-5 criteria. While established insomnia questionnaires, including the ISI<sup>27</sup>  
9 and Athens Insomnia Scale<sup>37</sup> probe perceived severity of EMA, ~~However, to our~~  
10 knowledge, quantitative values for EMA, to our knowledge, are yet to be defined. To  
11 some extent, SCI item 2 on wakefulness during the night may capture this complaint,  
12 but we recommend that the clinician follows-up a 'positive' answer to locate the  
13 nature and temporal position of wakefulness during the sleep period. **Moreover, other**  
14 **core DSM-5 criteria do not feature as SCI items (e.g. the sleep difficulty occurs**  
15 **despite adequate opportunity for sleep; the insomnia is not better explained by and**  
16 **does not occur exclusively during the course of another sleep-wake disorder; and the**  
17 **insomnia is not attributable to the physiological effects of a substance). However,**  
18 **these items are not easy to probe unambiguously with a self-completed psychometric**  
19 **instrument~~tool~~ and would require careful scrutiny by a treating clinician. Thus, the**  
20 **SCI should be viewed as a screening tool, consistent with features of DSM-5, but**  
21 **requiring careful follow-up in clinical practice.**  
22  
23  
24  
25  
26  
27  
28  
29  
30  
31  
32  
33  
34  
35  
36  
37  
38  
39  
40  
41  
42  
43  
44  
45  
46  
47  
48  
49  
50  
51  
52  
53  
54  
55  
56  
57  
58  
59  
60

Formatted: Superscript

Formatted: Superscript



## REFERENCES

1. Singleton N, Bumpstead R, O'Brien M, et al. Psychiatric morbidity among adults living in private households, 2000. London: The Office for National Statistics, HMSO; 2001.
2. Morin CM, Benca R. Chronic insomnia. *Lancet* 2012;379(9821):1129-41.
3. Falloon K, Arroll B, Elley CR, Fernando A. The assessment and management of insomnia in primary care. *BMJ* 2011; 342: d2899.
4. Lichstein K. Secondary insomnia: A myth dismissed. *Sleep Med Rev* 2006; 10: 3-5.
5. Stores G, Crawford C. Medical student education in sleep and its disorders. *J Royal College Physicians London* 1998; 32:149-153.
6. Harvey AG. *Insomnia: Symptom or diagnosis? Clinical Psychology Review* 2001;21:1037-1059.
7. Reynolds CF, Redline S. The DSM-V sleep-wake disorders nosology: An update and an invitation to the sleep community. *J Clin Sleep Med* 2010;15:9-10.
8. American Psychiatric Association. M00 Insomnia Disorder. DSM-5 Development Web site.  
<http://www.dsm5.org/ProposedRevision/Pages/proposedrevision.aspx?rid=65#>  
/ Updated June 2, 2010.
9. American Psychiatric Association. *Diagnostic and statistical manual of mental disorders* (5th ed.). Arlington, VA, 2013.
10. Morin CM, Belanger L, LeBlanc M, et al. The natural history of insomnia: A population-based 3-year longitudinal study. *Archives of internal Medicine* 2009; 169:447-453.
11. Green, M., Benzeval, M., Espie, C.A., Hunt, K. The longitudinal course of insomnia symptoms: inequalities by gender and occupational class among

- 1  
2  
3  
4  
5  
6 two different age cohorts followed for 20 years in the West of Scotland.  
7  
8 SLEEP 2012;35:385-393.
- 9  
10 12. Vgontzas AN, Liao D, Bixler EO, Chrousos GP, Vela-Bueno A. Insomnia with  
11 objective short sleep duration is associated with a high risk for hypertension  
12 Sleep 2009;32:491-7.
- 13  
14 13. Vgontzas AN, Liao D, Pejovic S, Calhoun S, Karataraki M, Bixler EO.  
15 Insomnia with objective short sleep duration is associated with type 2  
16 diabetes: a population-based Study. Diabetes Care 2009;32:1980-5.
- 17  
18 14. Baglioni C, Battagliese G, Feige B, et al. Insomnia as a predictor of  
19 depression: A meta-analytic evaluation of longitudinal epidemiological  
20 studies. J Affect Disord 2011;135:10-19.
- 21  
22 15. Kyle SD, Morgan K, Espie C. Insomnia and health-related quality of life. Sleep  
23 Med Rev 2010;14; 69-82.
- 24  
25 16. Sivertsen B, Overland S, Neckelman D, Glozier N, Krokstad S, Pallesen S,  
26 Nordhus I, Bjorvatn B, Mykletun A. The long-term effect of insomnia on work  
27 disability: The HUNT-2 historical cohort study. Am J Epidemiol  
28 2006;163:1018-1024.
- 29  
30 17. Leger D, Bayon V. Societal costs of insomnia. Sleep Med Rev 2010;14:379-  
31 389.
- 32  
33 18. Morin CM, Bootzin RR, Buysse DJ, Edinger JD, Espie CA, Lichstein KL.  
34 Psychological and behavioral treatment of insomnia: Update of the recent  
35 evidence (1998-2004). Sleep 2006;29:1398-414.
- 36  
37 19. Riemann D, Perlis ML. The treatments of chronic insomnia: A review of  
38 benzodiazepine receptor agonists and psychological and behavioral  
39 therapies. Sleep Med Rev 2009;13:205-214.
- 40  
41 20. Espie, C.A. 'Stepped care': a health technology solution for delivering  
42 Cognitive Behavioral Therapy as a first line insomnia treatment. Sleep  
43 2009;32:1549-1558.

- 1  
2  
3  
4  
5  
6 21. Morin CM, LeBlanc M, Daley JP, Merette C. Epidemiology of insomnia:  
7 Prevalence, self-help treatments, consultations, and determinants of help-  
8 seeking behaviors. *Sleep Med* 2006; 7: 123-130.  
9  
10  
11 22. NICE Clinical Guideline 123. Common mental health disorders: Identification  
12 and pathways to care. 2011.  
13 <http://www.nice.org.uk/nicemedia/live/13476/54520/54520.pdf>  
14  
15  
16  
17 23. Kroenke, K., Spitzer, R.L. and Williams, J.B. (2001). The PHQ-9: Validity of a  
18 brief depression severity measure. *Journal of General Internal Medicine*,  
19 16:606–613.  
20  
21  
22 24. Spitzer, R,L., Kroenke, K., Williams, J.B.W. and Lowe, B. (2006). A brief  
23 measure for assessing generalized anxiety disorder: The GAD-7. *Archives of*  
24 *Internal Medicine*, 166:1092–1097  
25  
26  
27  
28 25. Bush, K., Kivlahan, D.R., McDonnell, M.B. et al. The AUDIT alcohol  
29 consumption questions (AUDIT-C): An effective brief screening test for  
30 problem drinking. *Arch Intern Med* 1998; 158; 1789-1795.  
31  
32  
33 26. Buysse DJ, Reynolds III CF, Monk TH, et al. The Pittsburgh Sleep Quality  
34 Index: a new instrument for psychiatric practice and research. *Psych Res*  
35 1989; 28: 193–213.  
36  
37  
38 27. Morin C.M. *Insomnia: Psychological assessment and management*. 1993.  
39 New York: Guilford.  
40  
41  
42 28. Edinger JD, Bonnet MH, Bootzin RR, Doghramji K, Dorsey CM, Espie CA et  
43 al. Derivation of research diagnostic criteria for insomnia: Report of an  
44 American Academy of Sleep Medicine Work Group. *Sleep*. 2004;27:1567-96.  
45  
46  
47 29. Lichstein KL, Durrence HH, Taylor DJ, Bush AJ, Riedel BW. Quantitative  
48 criteria for insomnia. *Behav Res Ther* 2003;41:427-445.  
49  
50  
51 30. Moul DE, Hall M, Pilkonis PA, Buysse, DJ. Self-report measures of insomnia  
52 in adults: rationales, choices, and needs. *Sleep Med Rev* 2004; 8: 177-198.  
53  
54  
55  
56  
57  
58  
59  
60

- 1  
2  
3  
4  
5  
6 31. Espie CA, Kyle SD, Hames P, Cyhlarova E, Benzeval. The daytime impact of  
7 DSM-5 Insomnia Disorder: comparative analysis of insomnia subtypes from  
8 the Great British Sleep Survey (n=11,129). *J Clin Psychiatry* 73(12):e1478-  
9 1484  
10  
11  
12  
13 32. Gardani M, Miller CB, Biello S, Ellis J, Von Schantz M, Archer S. The  
14 association of sleepiness and diurnal preference with salivary amylase  
15 activity. Abstracts of 4th International Congress of WASM & 5th Conference  
16 of CSS / Sleep Medicine 12, Suppl. 1 (2011) S1–S130.  
17  
18  
19  
20 33. Espie CA, Kyle SD, Williams C, et al. A randomized, placebo-controlled, trial  
21 of online Cognitive Behavioral Therapy for chronic Insomnia Disorder  
22 delivered via an automated media-rich web application. *Sleep* 2012; 35: 769-  
23 781.  
24  
25  
26  
27 34. Zigmond AS, Snaith RP. The hospital anxiety and depression scale. *Acta*  
28 *Psychiatrica Scandinavica* 1983; 67: 361-370.  
29  
30  
31 35. Henry JD, Crawford JR. The short-form version of the Depression Anxiety  
32 Stress Scales (DASS-21): Construct validity and normative data in a large  
33 non-clinical sample, *Br J Clin Psychol* 2005;44:227-239.  
34  
35  
36  
37 [36. Morin CM, Belleville G, Belanger L, Ivers H. The Insomnia Severity Index:  
38 Psychometric indicators to detect insomnia cases and evaluate treatment  
39 response. \*SLEEP\* 2011;34:601-608.](#)  
40  
41  
42  
43 ~~36.~~ [37. Soldatos CR, Dikeos DG, Paprigopoulos TJ. Athens insomnia scale:  
44 validation of an instrument based on ICD-10 criteria. \*J Psychosom Res\*  
45 \*2000;48:555-560.\*](#)  
46  
47  
48 ~~37. Kroenke K, Spitzer RL, Williams JB, et al. Anxiety disorders in primary care:  
49 prevalence, impairment, comorbidity, and detection. *Ann Intern Med*  
50 *2007;146:317-25.*~~  
51  
52  
53  
54  
55  
56  
57  
58  
59  
60

Formatted: (Asian) Chinese (PRC), (Other) English (U.S.)

- 1  
2  
3  
4  
5  
6 38. ~~Dyas JV, Apekey TA, Tilling M, Orner R, Middleton H, Siriwardena AN. Patients' and clinicians' experiences of consultation in primary care for sleep problems and insomnia: a focus group. Br J Gen Pract 2010;60:329-333.~~
- 7  
8  
9  
10  
11 39. ~~Stinson K, Tang NKY, Harvey AG. Barriers to treatment seeking in primary insomnia in the United Kingdom: a cross-sectional perspective. Sleep 2006; 29:1643-1646.~~
- 12  
13  
14  
15  
16  
17 40. ~~National Institute of Clinical Excellence. NICE implementation uptake report: insomnia - newer hypnotic drugs. 2006. (<http://www.nice.org.uk/media/640/85/TA77NICEImplUptake.pdf>)~~
- 18  
19  
20  
21  
22 41. ~~Glass J, Lanctot KL, Herrmann N, Sproule BA, Busto UE. Sedative hypnotics in older people with insomnia: meta-analysis of risks and benefits. BMJ 2005; 331(7526):1169.~~
- 23  
24  
25  
26  
27  
28 42. ~~Kripke D. Hypnotic drugs: deadly risks, doubtful benefits. Sleep Med Rev 2000;4:5-20.~~
- 29  
30  
31  
32 43. ~~Kripke DF, Langer RD, Kline LE. Hypnotics' association with mortality or cancer: a matched cohort study. BMJ Open 2012;2:e000850. doi:10.1136/bmjopen-2012-000850.~~
- 33  
34  
35  
36  
37 44. ~~Luyster FS, Strollo PJ, Zee P, et al. Sleep: A health imperative. SLEEP 2012; 35: 727-734.~~
- 38  
39  
40  
41  
42  
43  
44  
45  
46  
47  
48  
49  
50  
51  
52  
53  
54  
55  
56  
57  
58  
59  
60

## Appendix: The Sleep Condition Indicator

| Item                                                                                                                | Score                           |             |             |             |           |
|---------------------------------------------------------------------------------------------------------------------|---------------------------------|-------------|-------------|-------------|-----------|
|                                                                                                                     | 4                               | 3           | 2           | 1           | 0         |
| <b>Thinking about a typical night in the last month ...</b>                                                         |                                 |             |             |             |           |
| 1. ... how long does it take you to fall asleep?                                                                    | 0 – 15 min                      | 16 – 30 min | 31 – 45 min | 46 – 60 min | ≥ 61 min  |
| 2. ... if you then wake up during the night ... how long are you awake for in total?<br>(add all the awakenings up) | 0 – 15 min                      | 16 – 30 min | 31 – 45 min | 46 – 60 min | ≥ 61 min  |
| 3. ... how many nights a week do you have a problem with your sleep?                                                | 0 - 1                           | 2           | 3           | 4           | 5 - 7     |
| 4. ... how would you rate your sleep quality?                                                                       | Very good                       | Good        | Average     | Poor        | Very poor |
| <b>Thinking about the past month, to what extent has poor sleep ...</b>                                             |                                 |             |             |             |           |
| 5. ... affected your mood, energy, or relationships?                                                                | Not at all                      | A little    | Somewhat    | Much        | Very much |
| 6. ... affected your concentration, productivity, or ability to stay awake                                          | Not at all                      | A little    | Somewhat    | Much        | Very much |
| 7. ... troubled you in general                                                                                      | Not at all                      | A little    | Somewhat    | Much        | Very much |
| <b>Finally ...</b>                                                                                                  |                                 |             |             |             |           |
| 8. ... how long have you had a problem with your sleep?                                                             | I don't have a problem / < 1 mo | 1 – 2 mo    | 3 – 6 mo    | 7 – 12 mo   | > 1 yr    |

## Scoring instructions:

- Add the item scores to obtain the SCI total (minimum 0, maximum 32)
- A higher score means better sleep
- Scores can be converted to 0 – 10 format (minimum 0, maximum 10) by dividing total by 3.2
- Item scores in grey area represent threshold criteria for Insomnia Disorder

A free online version, with built-in score convertor can be found at [www.sleepio.com/clinic](http://www.sleepio.com/clinic)

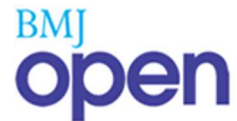

**The Sleep Condition Indicator: a clinical screening tool to  
evaluate  
Insomnia Disorder**

|                                    |                                                                                                                                                                                                                       |
|------------------------------------|-----------------------------------------------------------------------------------------------------------------------------------------------------------------------------------------------------------------------|
| Journal:                           | <i>BMJ Open</i>                                                                                                                                                                                                       |
| Manuscript ID:                     | bmjopen-2013-004183.R2                                                                                                                                                                                                |
| Article Type:                      | Research                                                                                                                                                                                                              |
| Date Submitted by the Author:      | 17-Jan-2014                                                                                                                                                                                                           |
| Complete List of Authors:          | Espie, Colin; University of Oxford,<br>Kyle, Simon; University of Manchester,<br>Hames, Peter; Sleepio Ltd.,<br>Gardani, Maria; University of Glasgow,<br>Fleming, Leanne; University of Glasgow,<br>Cape, John; UCL, |
| <b>Primary Subject<br>Heading</b>: | Mental health                                                                                                                                                                                                         |
| Secondary Subject Heading:         | Mental health                                                                                                                                                                                                         |
| Keywords:                          | SLEEP MEDICINE, PSYCHIATRY, Adult psychiatry < PSYCHIATRY                                                                                                                                                             |
|                                    |                                                                                                                                                                                                                       |

SCHOLARONE™  
Manuscripts

The Sleep Condition Indicator: a clinical screening tool to evaluate  
Insomnia Disorder

Colin A. Espie, PhD<sup>1,3</sup>, Simon D. Kyle, PhD<sup>2</sup>, Peter Hames, MA Oxon<sup>3</sup>, Maria  
Gardani, PhD<sup>4</sup>, Leanne Fleming, PhD<sup>4</sup>, John Cape, PhD<sup>5</sup>

<sup>1</sup> Nuffield Department of Clinical Neurosciences/ Sleep & Circadian Neuroscience  
Institute, University of Oxford, UK  
*Colin A. Espie, Professor*

<sup>2</sup> School of Psychological Sciences, University of Manchester, UK  
*Simon D. Kyle, Lecturer*

<sup>3</sup> Sleepio Limited, London, UK  
*Peter Hames, co-founder*

<sup>4</sup> Institute of Health & Wellbeing, University of Glasgow, UK  
*Maria Gardani, Research Fellow, Leanne Fleming, Research Fellow*

<sup>5</sup> Camden & Islington NHS Trust, London, UK  
*John Cape, Professor & Head of Psychological Therapies*

Corresponding Author:

Colin A. Espie, Nuffield Department of Clinical Neurosciences/ Sleep & Circadian  
Neuroscience Institute, University of Oxford, Level 6, West Wing, John Radcliffe  
Hospital, Oxford, OX3 9DU, UK.

Key words: insomnia, assessment, patient outcomes, DSM-5, psychometric, scale



**ABSTRACT**

*Objective:* Describe the development and psychometric validation of a brief scale [The Sleep Condition Indicator (SCI)] to evaluate Insomnia Disorder in everyday clinical practice.

*Design:* The SCI was evaluated across five study samples..Content validity, internal consistency and concurrent validity were investigated.

*Participants:* 30,941 individuals (71% female) completed the SCI along with other descriptive demographic and clinical information.

*Setting:* Data acquired on dedicated web-sites.

*Results:* The 8-item SCI (concerns about getting to sleep, remaining asleep, sleep quality, daytime personal functioning, daytime performance, duration of sleep problem, nights per week having a sleep problem, and extent troubled by poor sleep) had robust internal consistency ( $\alpha \geq 0.86$ ) and showed convergent validity with the Pittsburgh Sleep Quality Index and Insomnia Severity Index.. A 2-item short-form (SCI-02: nights per week having a sleep problem, extent troubled by poor sleep), derived using linear regression modelling, correlated strongly with the SCI total score ( $r=.90$ ).

*Conclusions:* The SCI has potential as a clinical screening tool for appraising insomnia complaints against DSM-5 criteria.

### **STRENGTHS AND LIMITATIONS**

- Existing instruments used to evaluate insomnia lack specificity or do not permit assessment against the latest diagnostic criteria. This study describes the development and validation of a new instrument (the sleep condition indicator) for use in everyday clinical practice. The SCI is valid, reliable and sensitive to change in insomnia severity. Its brevity and appealing visual format permit rapid assessment and interpretation of poor sleep, against contemporary clinical diagnostic criteria.
- While we have used large surveys and treatment evaluation to assess SCI properties, more work is required to assess predictive validity with reference to independent clinical evaluation of Insomnia Disorder.

## INTRODUCTION

Although insomnia is the most common of all mental health complaints,<sup>1</sup> it is seldom adequately assessed and treatment services are often poor.<sup>2,3</sup> This perhaps reflects the perspective that insomnia is usually a symptom,<sup>4</sup> coupled with minimal medical education on sleep and its disorders.<sup>5</sup> However, there are three reasons why this perspective must now change. First, insomnia is not merely a symptom. It has for some time been proposed as a genuine diagnosis (see Harvey review),<sup>6</sup> and recently the DSM-5 Workgroup recognised that the previous dichotomy of primary versus secondary insomnia is not evidence-based.<sup>7,8</sup> Accordingly, DSM-5 now recommends that 'Insomnia Disorder' should be coded "*whenever diagnostic criteria are met whether or not there is a co-existing physical, mental or sleep disorder*".<sup>9</sup> Second, insomnia is not necessarily transient or benign. Once established, it is remarkably persistent,<sup>10,11</sup> constituting a risk factor for the development of physical and mental health problems, notably depression,<sup>12-14</sup> as well as adverse effects upon quality of life.<sup>15</sup> Chronic insomnia is also associated with high societal cost,<sup>16</sup> and is, for example, a robust predictor of work disability.<sup>17</sup> Third, insomnia is treatable. There is a very substantial level 1 evidence-base, evaluating pharmacological and cognitive-behavioural therapies (CBT),<sup>18,19</sup> although the latter are very seldom available.<sup>3,20</sup>

Insomnia is ubiquitous<sup>21</sup> so it is important that clinicians, GPs in particular, have a reliable, valid, and brief, screening tool. A wide range of such instruments is a standard part of patient-centred care,<sup>22</sup> for example, for depression,<sup>23</sup> anxiety<sup>24</sup> and alcohol problems.<sup>25</sup> In the insomnia field, two scales in particular are widely used: the Pittsburgh Sleep Quality Index (PSQI)<sup>26</sup> and the Insomnia Severity Index (ISI).<sup>27</sup> The PSQI is an established research tool, which has a cut-off score indicative of sleep disturbance. However, it lacks specificity for insomnia. The ISI is very sound psychometrically, and is more specific and based on DSM-IV criteria for insomnia. It is used in the main to select people for clinical trials and as an outcome measure.

1  
2  
3 In this paper, we present a further measure (the Sleep Condition Indicator:  
4 SCI) that may have some useful features. The SCI is informed by the development  
5 phase for DSM-5 insomnia disorder,<sup>7,8</sup> coupled with published research diagnostic  
6 criteria<sup>28</sup> and recommended quantitative parameters for sleep disturbance.<sup>29</sup> In  
7 keeping with DSM-5, the SCI also evaluates associated daytime factors, which are  
8 important drivers of clinical complaint<sup>21</sup> and should be incorporated in insomnia  
9 measurement.<sup>15,30</sup> In terms of utility, the SCI is brief but versatile. It yields a) a  
10 dimensional perspective on sleep quality: on an intuitive, global scale where higher  
11 scores represent better sleep; b) a visual profile of night-time and daytime symptoms  
12 that the clinician can use in consultations; and c) indicative cut-off points for clinically-  
13 significant Insomnia. This paper summarises the development and evaluation of the  
14 SCI across several studies, and in doing so addresses two major questions. First,  
15 does the SCI have adequate psychometric properties?; and second, is it possible to  
16 derive an even briefer, short-form, SCI that has similar psychometric characteristics?  
17  
18  
19  
20  
21  
22  
23  
24  
25  
26  
27  
28  
29  
30  
31  
32

## 33 **METHODS**

### 34 **Sample characteristics**

35  
36 Data are reported from five validation studies (total n=30,941; 71% Female) in which  
37 SCI items were administered. The Great British Sleep Survey (GBSS) was an open  
38 access, web-based survey completed by adults (18+yr.) with a UK postcode yielding  
39 data on 12,628 participants [72% Female; mean age = 38.7yr (SD = 14.5)] between  
40 February 2010 and August 2011.<sup>31</sup> The GBSS+ was a revision of the GBSS,  
41 extended to any valid zip code worldwide, from May 2011 to March 2012 (n=11,017;  
42 68% Female; 42.3yr (16.5)). The TV sample was obtained in response to a network  
43 programme (The Food Hospital, Channel 4) on the sleep benefits of tart cherry juice  
44 (n=6,876; 76% F, 36.4yr (13.3)). Glasgow Science Centre data (n=256; 56% Female,  
45 40.3yr (14.9)) were collected in 2009-2010 during a study which assessed the  
46 relationship between salivary alpha-amylase, sleep pressure and diurnal  
47  
48  
49  
50  
51  
52  
53  
54  
55  
56  
57  
58  
59  
60

1  
2  
3 preference.<sup>32</sup> Finally, an RCT sample comprised 164 participants (72% F, 48.9yr  
4 (13.7)] recruited into a placebo-controlled evaluation of CBT for insomnia.<sup>33</sup> Ethical  
5 agreement concerning the latter two studies are provided in the source manuscripts.  
6  
7 For the open access web surveys participation was covered by the site terms.  
8  
9

10  
11 Across our combined largest samples (GBSS, GBSS+, TV), women were  
12 slightly younger than men [38.5 (14.9) vs 40.1 (14.7) yrs;  $t(27638) = 7.94, p < .0001$ ]  
13 and the great majority was in average or better physical health (86%) and mental  
14 health (82%) [5-point scale: 0 'very good', 1 'good', 2 'average', 3 'poor', 4 'very  
15 poor']. Respondents who made some use of prescription sleeping pills (9.1%) were 7  
16 years older than those who did not [46.2 (15.1) vs 39.1 (15.1)yr,  $t(20813) = 19.6,$   
17  $p < .0001$ ] and had a substantially poorer SCI score [8.56 (4.93) vs 15.6 (7.80),  
18  $t(20813) = 38.8, p < .0001$ ]. Of the total sample, 18.1% took over-the-counter sleep  
19 aids (OTCs), and more than one-third of those taking sleeping pills also used OTCs.  
20  
21  
22  
23  
24  
25  
26  
27  
28  
29  
30

### 31 **Design and Measurement**

32  
33 This is a psychometric scale development study. Standard approaches to the  
34 appraisal of validity, reliability and sensitivity were applied, making appropriate  
35 selection amongst the available datasets. These methods and datasets will be  
36 introduced in an integrated way in subsequent sections, so that the research process  
37 can be more clearly expressed and understood.  
38  
39  
40  
41  
42  
43  
44  
45  
46  
47

## 48 **RESULTS**

### 49 **Development of the Sleep Condition Indicator (SCI)**

#### 50 *Content Validity*

51  
52 An 8-item scale was developed (see Appendix) based upon DSM-5 workgroup draft  
53 criteria that were available at the time (in 2010).<sup>7,8</sup> At that stage, a consultation  
54 process was underway and draft information was posted on the APA website.  
55  
56  
57  
58  
59  
60

1  
2  
3 Consequently, the SCI items generated comprised 2 quantitative items on sleep  
4 continuity [item 1: getting to sleep; item 2: remaining asleep], two qualitative items on  
5 sleep satisfaction/dissatisfaction [item 4: sleep quality; item 7: troubled or not], two  
6  
7 quantitative items on severity [item 3: nights per week; item 8: duration of problem],  
8  
9 and two qualitative items on attributed daytime consequences of poor sleep [item 5:  
10 effects on mood, energy, or relationships (personal functioning); item 6: effects on  
11 concentration, productivity, or ability to stay awake (daytime performance)].  
12  
13  
14  
15  
16

17 Validated quantitative criteria for sleep disruption (e.g. 31-45 minutes to fall  
18 asleep) served as responses for sleep continuity items 1 and 2.<sup>8,28,29</sup> Items 5 and 6  
19 on daytime effects were derived by Principal Components Analysis (PCA; Varimax  
20 rotation) of six individual proposed DSM-5 impact areas, using combined datasets  
21 (GBSS, GBSS+, TV, RCT: valid n= 29,650). PCA yielded satisfactory Kaiser-Meyer-  
22 Olkin (KMO=0.874) and Bartlett ( $p<.0001$ ) statistics. Iteration converged after 3  
23 rotations. A two component model (derived from inspection of the scree plot and a  
24 criterion for associated variance  $\geq 10\%$ ) explained 75.8% of total variance, with item  
25 loadings  $\geq .60$ . Component 1 (Eigenvalue=3.83; 63.8% of variance) comprised  
26 'mood' (loading = .812) 'energy' (.651) and 'relationships' (.859), and was  
27 subsequently named 'personal functioning'. Component 2 (Eigenvalue=0.72; 12.0%  
28 of variance) comprised 'concentration' (.719), 'get through work' (.724), and 'stay  
29 awake' (.875) may be regarded as 'daytime performance'. PCA offered a relatively  
30 pure solution, although 'energy' also loaded significantly on component 2 (.519).  
31  
32  
33  
34  
35  
36  
37  
38  
39  
40  
41  
42  
43  
44  
45

46 We then investigated the inter-relationships of our 8 SCI items using the  
47 same methodology, but applying this time a minimum item loading of 0.40, to permit  
48 incorporation of all eight items. PCA with Varimax Rotation (KMO=0.888; Bartlett,  
49  $p<.0001$ ) yielded a two component solution (66.4% explained variance). Component  
50 1 (Eigenvalue=4.256, 53.2% variance), named 'sleep pattern' comprised items 1, 2,  
51 3, 4 and 8 with factor loading ranging from 0.453 to 0.776. Component 2  
52 (Eigenvalue=1.06, 13.2% variance), 'sleep-related impact' comprised item 5 (factor  
53  
54  
55  
56  
57  
58  
59  
60

1  
2  
3 loading 0.886), and item 6 (0.911). Consistent with clinical presentation, concerns  
4 about sleep (item 7) loaded significantly, and similarly, on both 'sleep pattern' (0.616)  
5 and 'sleep-related impact' components (0.576).  
6  
7  
8  
9

### 10 *Response format*

11  
12 Each item was scored on a 5-point scale (0 - 4), with lower scores, in the 0 – 2 range,  
13 reflecting putative threshold criteria for Insomnia Disorder (shaded area: see  
14 Appendix). The clinician can then see at a glance the profile of possible concerns.  
15 Possible total score ranges from 0–32, with higher values indicative of better sleep.  
16 However, scores can be readily transformed into a more intuitive 0-10 SCI range,  
17 either by dividing the total by 3.2, or by using an online version with automated  
18 scoring, which is available free of charge ([www.sleepio.com/clinic/](http://www.sleepio.com/clinic/)).  
19  
20  
21  
22  
23  
24  
25  
26  
27  
28

### 29 *Concurrent Validity and association with related domains*

30  
31 Data from the Science Centre sample demonstrated that the SCI correlates inversely  
32 with the PSQI ( $r=-.734$ ) and the ISI ( $r=-.793$ ), suggesting measurement properties  
33 consistent with these related measures. There was also a small but significant  
34 association of sleep condition with self-rated physical health ( $r =.222$ ), and an  
35 association also with mental health ( $r=.335$ ). Using more specific measures, in the  
36 Science Centre sample, correlation of the SCI with symptoms of depression ( $r=-.426$ )  
37 and anxiety ( $r=-.400$ ) on the Hospital Anxiety and Depression Scale<sup>34</sup> was modest,  
38 and greater than we observed in our RCT sample [on the Depression Anxiety Stress  
39 Scale<sup>35</sup>: depression ( $r=-.267$ ), anxiety ( $r=-.236$ ) and stress ( $r=-.263$ )].  
40  
41  
42  
43  
44  
45  
46  
47  
48  
49  
50

51  
52 We have not at this stage tested the discriminant validity of the SCI against clinical  
53 diagnosis of insomnia disorder. As a first step, however, using our Science Centre  
54 sample, we tested the concurrent validity of SCI cut-offs (score  $\leq 16$ ), reflecting  
55 minimum criteria for putative Insomnia Disorder (see appendix), against published  
56  
57  
58  
59  
60

1  
2  
3 validated ISI cut-off scores. We first categorized our sample according to ISI ranges  
4 (ISI score=0-14, reflecting “no insomnia disorder” [n=228] versus “probable insomnia  
5 disorder” ISI score=15-28, n=27]) and conducted an independent *t*-test on SCI total  
6 score. Mean SCI values for the “probable insomnia disorder” category were 10.7  
7 (SD=5.3) versus 22.9 (SD=6.2) for “no insomnia disorder” ( $t=9.86$ ,  $p<.0001$ ).  
8 Applying SCI cut-off  $\leq 16$ , 89% of the sample were correctly identified as having  
9 “probable insomnia disorder” (ISI scores of  $\geq 15$ ), while SCI score of  $>16$  correctly  
10 identified 82% of those with “no insomnia disorder”. These findings provide further  
11 evidence of concurrent validity for the SCI and help to confirm that a score of  $\leq 16$  on  
12 the SCI seems reasonable to detect possible insomnia disorder.  
13  
14  
15  
16  
17  
18  
19  
20  
21  
22  
23

#### 24 25 *Internal consistency*

26  
27 Cronbach's  $\alpha$  for the GBSS sample was strong at 0.857 (range of  $\alpha$ -if-item-deleted  
28 0.822-0.860). Replication of these internal consistency data was obtained from the  
29 GBSS+ sample ( $\alpha=0.865$ ). Mean corrected item-total correlation was moderate  
30 ( $r=0.620$ ) indicating substantial unique variance per item (shared variance = 38%).  
31  
32  
33  
34  
35  
36  
37

#### 38 *Sensitivity to change*

39 We have previously reported that the SCI is sensitive as a measure of treatment  
40 outcome.<sup>33</sup>  
41  
42  
43  
44  
45

#### 46 **Short-form version of the SCI**

47 Although the SCI is brief, in clinical practice ultra short-form scales is often helpful  
48 (e.g. GAD-2).<sup>36</sup> Accordingly, we conducted a stepwise linear regression analysis to  
49 determine which subset of items (independent variables) explained the greatest  
50 proportion of variance in the dependent variable, SCI total score. A two-item (SCI-  
51 02), comprising item 3 ‘...how many nights’ (standardized  $\beta = .515$ ) and item 7 ‘...  
52 troubled you in general’ ( $\beta = .491$ ) together predicted 82% of variance (Adjusted  $R^2 =$   
53  
54  
55  
56  
57  
58  
59  
60



1  
2  
3 .820) in the full scale SCI [ $R^2$  change = .672 + .148;  $F(2,27637) = 62770$ ,  $p < .0001$ ].  
4  
5 As a check on the independence of residuals we computed the Durbin-Watson  
6  
7 statistic, which was found to be 1.80, suggesting no serial correlation. The SCI-02  
8  
9 also correlated strongly with the SCI score total ( $r = .904$ ).  
10

## 11 12 13 14 15 **DISCUSSION**

16  
17 Pre-requisite to improved insomnia care is the availability and regular use of  
18  
19 reliable and valid insomnia assessment. Only then can a clinical problem be  
20  
21 recognised as distinct from normal variation, and a persistent problem be  
22  
23 differentiated from a transient one. We have reported here the development and  
24  
25 preliminary validation of the SCI; a DSM-5 compliant, brief screening measure that  
26  
27 may be fit for such purposes. Results indicate that the SCI is internally consistent,  
28  
29 sensitive to change, and correlates strongly with established screening instruments,  
30  
31 known to be sensitive to clinical insomnia (PSQI and ISI). Principal components  
32  
33 analysis revealed a 2-component solution (66% of the variance), reflecting the  
34  
35 underlying complaint of insomnia; that is, concerns about sleep pattern and concerns  
36  
37 about the impact of poor sleep, both of which need to be addressed in clinical  
38  
39 practice. The derived 2-item short-form version, focusing on the severity of the  
40  
41 presenting complaint coupled with frequency of the sleep problem, correlated  
42  
43 strongly with total SCI score and we would suggest that these might be the lead  
44  
45 questions for a clinician to use in the context of their consulting room practice.  
46  
47

48  
49 Of course, further work is required, particularly real world studies of how the  
50  
51 SCI might be used in population screening and in the evaluation of outcome following  
52  
53 an episode of care. While comparisons with ISI cut-offs provide evidence of  
54  
55 concurrent validity and indicate that SCI score  $\leq 16$  may help detect probable  
56  
57 insomnia disorder, studies of predictive validity with reference to independent clinical  
58  
59  
60

1  
2  
3 evaluation of Insomnia Disorder (the gold standard), are essential before firm  
4 conclusions can be made.  
5

6  
7 It should be noted that over half of respondents to our online surveys,  
8 screened positive for possible Insomnia Disorder. These, of course, are not  
9 prevalence data as we did not adopt a formal population sampling approach.  
10 Nevertheless, the inevitable bias of these open access surveys towards those with  
11 sleep concerns does permit us a) to profile many respondents, against criteria; b) to  
12 conduct powerful analyses of the properties of the SCI; and c) to make comparisons  
13 with sizeable cohorts of good sleepers. Importantly, for our Science Centre sample,  
14 approximately 10% scored in the probable insomnia disorder range (ISI score  $\geq 15$ ),  
15 consistent with prevalence data,<sup>2</sup> providing further support for our ISI-SCI concurrent  
16 validity analysis.  
17  
18  
19  
20  
21  
22  
23  
24  
25  
26

27 Furthermore, a limitation of the SCI is that it does not contain specific  
28 questions relating to early morning awakenings (EMA; premature awakening with  
29 inability to return to sleep) – a symptom which has recently been incorporated into  
30 DSM-5 criteria. While established insomnia questionnaires, including the ISI<sup>27</sup> and  
31 Athens Insomnia Scale<sup>37</sup> probe perceived severity of EMA, quantitative values for  
32 EMA, to our knowledge, are yet to be defined. To some extent, SCI item 2 on  
33 wakefulness during the night may capture this complaint, but we recommend that the  
34 clinician follows-up a 'positive' answer to locate the nature and temporal position of  
35 wakefulness during the sleep period. Moreover, other core DSM-5 criteria do not  
36 feature as SCI items (e.g. the sleep difficulty occurs despite adequate opportunity for  
37 sleep; the insomnia is not better explained by and does not occur exclusively during  
38 the course of another sleep-wake disorder; and the insomnia is not attributable to the  
39 physiological effects of a substance). However, these items are not easy to probe  
40 unambiguously with a self-completed psychometric instrument and would require  
41 careful scrutiny by a treating clinician. It is, of course, possible that sleep disorders  
42 other than insomnia (e.g. circadian rhythm sleep disorders, sleep-breathing  
43  
44  
45  
46  
47  
48  
49  
50  
51  
52  
53  
54  
55  
56  
57  
58  
59  
60

1  
2  
3 disorders) may also lead to low scores on the SCI. Thus the SCI should be viewed as  
4  
5 an insomnia screening tool, consistent with features of DSM-5, but requiring careful  
6  
7 follow-up in clinical practice to fully define the nature of sleep disturbance.  
8  
9  
10  
11  
12  
13  
14  
15  
16  
17  
18  
19  
20  
21  
22  
23  
24  
25  
26  
27  
28  
29  
30  
31  
32  
33  
34  
35  
36  
37  
38  
39  
40  
41  
42  
43  
44  
45  
46  
47  
48  
49  
50  
51  
52  
53  
54  
55  
56  
57  
58  
59  
60

For peer review only

**Contributorship Statement**

All authors have completed the ICMJE uniform disclosure form and declare: CE is Clinical and Scientific Director of Sleepio Ltd. and PH is co-founder, shareholder and board member of Sleepio Ltd. SK has acted as a consultant for Sleepio Ltd.

**Competing Interests**

All authors engaged in the following study tasks: 1) substantial contributions to conception and design, acquisition of data, or analysis and interpretation of data; 2) drafting the article or revising it critically for important intellectual content; and 3) final approval of the version to be published.

**Data Sharing Statement**

N/A

## REFERENCES

1. Singleton N, Bumpstead R, O'Brien M, et al. Psychiatric morbidity among adults living in private households, 2000. London: The Office for National Statistics, HMSO; 2001.
2. Morin CM, Benca R. Chronic insomnia. *Lancet* 2012;379(9821):1129-41.
3. Falloon K, Arroll B, Elley CR, et al. The assessment and management of insomnia in primary care. *BMJ* 2011; 342: d2899.
4. Lichstein K. Secondary insomnia: A myth dismissed. *Sleep Med Rev* 2006; 10: 3-5.
5. Stores G, Crawford C. Medical student education in sleep and its disorders. *J Royal College Physicians London* 1998; 32:149-153.
6. Harvey AG. Insomnia: Symptom or diagnosis? *Clinical Psychology Review* 2001;21:1037-1059.
7. Reynolds CF, Redline S. The DSM-V sleep-wake disorders nosology: An update and an invitation to the sleep community. *J Clin Sleep Med* 2010;15:9-10.
8. American Psychiatric Association. M00 Insomnia Disorder. DSM-5 Development Web site.  
<http://www.dsm5.org/ProposedRevision/Pages/proposedrevision.aspx?rid=65#>  
/ Updated June 2, 2010.
9. American Psychiatric Association. *Diagnostic and statistical manual of mental disorders* (5th ed.). Arlington, VA, 2013.
10. Morin CM, Belanger L, LeBlanc M, et al. The natural history of insomnia: A population-based 3-year longitudinal study. *Archives of internal Medicine* 2009; 169:447-453.
11. Green, M., Benzeval, M., Espie, C.A., et al. The longitudinal course of insomnia symptoms: inequalities by gender and occupational class among

- 1  
2  
3 two different age cohorts followed for 20 years in the West of Scotland.  
4  
5 SLEEP 2012;35:385-393.  
6  
7 12. Vgontzas AN, Liao D, Bixler EO, et al. Insomnia with objective short sleep  
8  
9 duration is associated with a high risk for hypertension Sleep 2009;32:491-7.  
10  
11 13. Vgontzas AN, Liao D, Pejovic S, et al. Insomnia with objective short sleep  
12  
13 duration is associated with type 2 diabetes: a population-based Study.  
14  
15 Diabetes Care 2009;32:1980-5.  
16  
17 14. Baglioni C, Battagliese G, Feige B, et al. Insomnia as a predictor of  
18  
19 depression: A meta-analytic evaluation of longitudinal epidemiological  
20  
21 studies. J Affect Disord 2011;135:10-19.  
22  
23 15. Kyle SD, Morgan K, Espie C. Insomnia and health-related quality of life. Sleep  
24  
25 Med Rev 2010;14; 69-82. Leger D, Bayon V. Societal costs of insomnia. Sleep  
26  
27 Med Rev 2010;14:379-389.  
28  
29 16. Sivertsen B, Overland S, Neckelman D, et al. The long-term effect of  
30  
31 insomnia on work disability: The HUNT-2 historical cohort study. Am J  
32  
33 Epidemiol 2006;163:1018-1024.  
34  
35 17. Morin CM, Bootzin RR, Buysse DJ, et al. Psychological and behavioral  
36  
37 treatment of insomnia: Update of the recent evidence (1998-2004). Sleep  
38  
39 2006;29:1398-414.  
40  
41 18. Riemann D, Perlis ML. The treatments of chronic insomnia: A review of  
42  
43 benzodiazepine receptor agonists and psychological and behavioral  
44  
45 therapies. Sleep Med Rev 2009;13:205-214.  
46  
47 19. Espie, C.A. 'Stepped care': a health technology solution for delivering  
48  
49 Cognitive Behavioral Therapy as a first line insomnia treatment. Sleep  
50  
51 2009;32:1549-1558.  
52  
53 20. Morin CM, LeBlanc M, Daley JP, et al. Epidemiology of insomnia: Prevalence,  
54  
55 self-help treatments, consultations, and determinants of help-seeking  
56  
57 behaviors. Sleep Med 2006; 7: 123-130.  
58  
59  
60

- 1  
2  
3 21. NICE Clinical Guideline 123. Common mental health disorders: Identification  
4 and pathways to care. 2011.  
5  
6 <http://www.nice.org.uk/nicemedia/live/13476/54520/54520.pdf>  
7  
8  
9 22. Kroenke, K., Spitzer, R.L. and Williams, J.B. (2001). The PHQ-9: Validity of a  
10 brief depression severity measure. *Journal of General Internal Medicine*,  
11 16:606–613.  
12  
13 23. Spitzer, R.L., Kroenke, K., Williams, J.B.W. et al. (2006). A brief measure for  
14 assessing generalized anxiety disorder: The GAD-7. *Archives of Internal*  
15 *Medicine*, 166:1092–1097  
16  
17 24. Bush, K., Kivlahan, D.R., McDonnell, M.B. et al. The AUDIT alcohol  
18 consumption questions (AUDIT-C): An effective brief screening test for  
19 problem drinking. *Arch Intern Med* 1998; 158; 1789-1795.  
20  
21 25. Buysse DJ, Reynolds III CF, Monk TH, et al. The Pittsburgh Sleep Quality  
22 Index: a new instrument for psychiatric practice and research. *Psych Res*  
23 1989; 28: 193–213.  
24  
25 26. Morin C.M. *Insomnia: Psychological assessment and management*. 1993.  
26 New York: Guilford.  
27  
28 27. Edinger JD, Bonnet MH, Bootzin RR, et al. Derivation of research diagnostic  
29 criteria for insomnia: Report of an American Academy of Sleep Medicine  
30 Work Group. *Sleep*. 2004;27:1567-96.  
31  
32 28. Lichstein KL, Durrence HH, Taylor DJ, et al. Quantitative criteria for insomnia.  
33 *Behav Res Ther* 2003;41:427-445.  
34  
35 29. Moul DE, Hall M, Pilkonis PA, et al. Self-report measures of insomnia in  
36 adults: rationales, choices, and needs. *Sleep Med Rev* 2004; 8: 177-198.  
37  
38 30. Espie CA, Kyle SD, Hames P, et al. The daytime impact of DSM-5 Insomnia  
39 Disorder: comparative analysis of insomnia subtypes from the Great British  
40 Sleep Survey (n=11,129). *J Clin Psychiatry* 73(12):e1478-1484  
41  
42  
43  
44  
45  
46  
47  
48  
49  
50  
51  
52  
53  
54  
55  
56  
57  
58  
59  
60

- 1  
2  
3 31. Gardani M, Miller CB, Biello S, ET et al. The association of sleepiness and  
4 diurnal preference with salivary amylase activity. Abstracts of 4th International  
5 Congress of WASM & 5th Conference of CSS / Sleep Medicine 12, Suppl. 1  
6 (2011) S1–S130.  
7  
8  
9  
10  
11 32. Espie CA, Kyle SD, Williams C, et al. A randomized, placebo-controlled, trial  
12 of online Cognitive Behavioral Therapy for chronic Insomnia Disorder  
13 delivered via an automated media-rich web application. *Sleep* 2012; 35: 769-  
14 781.  
15  
16  
17  
18  
19 33. Zigmond AS, Snaith RP. The hospital anxiety and depression scale. *Acta*  
20 *Psychiatrica Scandinavica* 1983; 67: 361-370.  
21  
22  
23 34. Henry JD, Crawford JR. The short-form version of the Depression Anxiety  
24 Stress Scales (DASS-21): Construct validity and normative data in a large  
25 non-clinical sample, *Br J Clin Psychol* 2005;44:227-239.  
26  
27  
28  
29 35. Kroenke K, Spitzer RL, Williams JB, et al. Anxiety disorders in primary care:  
30 prevalence, impairment, comorbidity, and detection. *Ann Intern Med*  
31 2007;146:317–25.  
32  
33  
34  
35 36. Soldatos CR, Dikeos DG, Paprigopoulos TJ. Athens insomnia scale:  
36 validation of an instrument based on ICD-10 criteria. *J Psychosom Res*  
37 2000;48:555-560.  
38  
39  
40  
41  
42  
43  
44  
45  
46  
47  
48  
49  
50  
51  
52  
53  
54  
55  
56  
57  
58  
59  
60



1  
2  
3  
4  
5  
6  
7  
8  
9  
10  
11  
12  
13  
14  
15  
16  
17  
18  
19  
20  
21  
22  
23  
24  
25  
26  
27  
28  
29  
30  
31  
32  
33  
34  
35  
36  
37  
38  
39  
40  
41  
42  
43  
44  
45  
46  
47  
48  
49  
50  
51  
52  
53  
54  
55  
56  
57  
58  
59  
60

The Sleep Condition Indicator: a clinical screening tool to evaluate

Formatted: Font color: Auto

Insomnia Disorder

Colin A. Espie, PhD<sup>1,3</sup>, Simon D. Kyle, PhD<sup>2</sup>, Peter Hames, MA Oxon<sup>3</sup>, Maria Gardani, PhD<sup>4</sup>, Leanne Fleming, PhD<sup>4</sup>, John Cape, PhD<sup>5</sup>

<sup>1</sup> Nuffield Department of Clinical Neurosciences/ Sleep & Circadian Neuroscience Institute, University of Oxford, UK  
*Colin A. Espie, Professor*

<sup>2</sup> School of Psychological Sciences, University of Manchester, UK  
*Simon D. Kyle, Lecturer*

<sup>3</sup> Sleepio Limited, London, UK  
*Peter Hames, co-founder*

<sup>4</sup> Institute of Health & Wellbeing, University of Glasgow, UK  
*Maria Gardani, Research Fellow, Leanne Fleming, Research Fellow*

<sup>5</sup> Camden & Islington NHS Trust, London, UK  
*John Cape, Professor & Head of Psychological Therapies*

Corresponding Author:

Colin A. Espie, Nuffield Department of Clinical Neurosciences/ Sleep & Circadian Neuroscience Institute, University of Oxford, Level 6, West Wing, John Radcliffe Hospital, Oxford, OX3 9DU, UK.

Key words: insomnia, assessment, patient outcomes, DSM-5, psychometric, scale

**ABSTRACT**

*Objective:* Describe the development and psychometric validation of a brief scale [The Sleep Condition Indicator (SCI)] to evaluate Insomnia Disorder in everyday clinical practice.

*Design:* The SCI was evaluated across five study ~~samples,ies, including large scale surveys, and a placebo controlled trial of Cognitive Behavioural Therapy (CBT) for insomnia.~~ Content validity, internal consistency ~~and,~~ concurrent validity ~~,~~ ~~and responsiveness to change~~ were investigated.

*Participants:* 30,941 individuals (71% female) completed the SCI along with other descriptive demographic and clinical information.

*Setting:* Data acquired on dedicated web-sites.

*Results:* The 8-item SCI (concerns about getting to sleep, remaining asleep, sleep quality, daytime personal functioning, daytime performance, duration of sleep problem, nights per week having a sleep problem, and extent troubled by poor sleep) had robust internal consistency ( $\alpha \geq 0.86$ ) and showed convergent validity with the Pittsburgh Sleep Quality Index and Insomnia Severity Index. ~~Sensitivity to treatment outcome using CBT (relative) to placebo was demonstrated in a randomised trial ( $d=0.95$ ).~~ A 2-item short-form (SCI-02: nights per week having a sleep problem, extent troubled by poor sleep), derived using linear regression modelling, correlated strongly with the SCI total score ( $r=.90$ ).

*Conclusions:* The SCI has potential as a clinical screening tool for appraising insomnia complaints against DSM-5 criteria.

1  
2  
3  
4  
5  
6  
7  
8  
9  
10  
11  
12

---

### **STRENGTHS AND LIMITATIONS**

- 13  
14  
15  
16  
17  
18  
19  
20  
21  
22  
23  
24  
25  
26  
27  
28  
29  
30  
31  
32  
33  
34  
35  
36  
37  
38  
39  
40  
41  
42  
43  
44  
45  
46  
47  
48  
49  
50  
51  
52  
53  
54  
55  
56  
57  
58  
59  
60
- Existing instruments used to evaluate insomnia lack specificity or do not permit assessment against the latest diagnostic criteria. This study describes the development and validation of a new instrument (the sleep condition indicator) for use in everyday clinical practice. The SCI is valid, reliable and sensitive to change in insomnia severity. Its brevity and appealing visual format permit rapid assessment and interpretation of poor sleep, against contemporary clinical diagnostic criteria.
  - While we have used large surveys and treatment evaluation to assess SCI properties, more work is required to assess predictive validity with reference to independent clinical evaluation of Insomnia Disorder.

## INTRODUCTION

Although insomnia is the most common of all mental health complaints,<sup>1</sup> it is seldom adequately assessed and treatment services are often poor.<sup>2,3</sup> This perhaps reflects the perspective that insomnia is usually a symptom,<sup>4</sup> coupled with minimal medical education on sleep and its disorders.<sup>5</sup> However, there are three reasons why this perspective must now change. First, insomnia is not merely a symptom. It has for some time been proposed as a genuine diagnosis (see Harvey review),<sup>6</sup> and recently the DSM-5 Workgroup recognised that the previous dichotomy of primary versus secondary insomnia is not evidence-based.<sup>7,8</sup> Accordingly, DSM-5 now recommends that 'Insomnia Disorder' should be coded "*whenever diagnostic criteria are met whether or not there is a co-existing physical, mental or sleep disorder*".<sup>9</sup> Second, insomnia is not necessarily transient or benign. Once established, it is remarkably persistent,<sup>10,11</sup> constituting a risk factor for the development of physical and mental health problems, notably depression,<sup>12-14</sup> as well as adverse effects upon quality of life.<sup>15</sup> Chronic insomnia is also associated with high societal cost,<sup>16</sup> and is, for example, a robust predictor of work disability.<sup>17</sup> Third, insomnia is treatable. There is a very substantial level 1 evidence-base, evaluating pharmacological and cognitive-behavioural therapies (CBT),<sup>18,19</sup> although the latter are very seldom available.<sup>3,20</sup>

Insomnia is ubiquitous<sup>21</sup> so it is important that clinicians, GPs in particular, have a reliable, valid, and brief, screening tool. A wide range of such instruments is a standard part of patient-centred care,<sup>22</sup> for example, for depression,<sup>23</sup> anxiety<sup>24</sup> and alcohol problems.<sup>25</sup> In the insomnia field, two scales in particular are widely used: the Pittsburgh Sleep Quality Index (PSQI)<sup>26</sup> and the Insomnia Severity Index (ISI).<sup>27</sup> The PSQI is a an established research tool, which has a cut-off score indicative of sleep disturbance. However, it lacks specificity for insomnia. The ISI is very sound

Formatted: Font color: Auto

Formatted: Font color: Auto

1  
2  
3  
4  
5  
6 psychometrically, and is more specific and based on DSM-IV criteria for insomnia. It  
7 is used in the main to select people for clinical trials and as an outcome measure.  
8

9  
10 In this paper, we present a further measure (the Sleep Condition Indicator:  
11 SCI) that may have some useful features. The SCI is informed by the development  
12 phase for DSM-5 insomnia disorder,<sup>7,8</sup> coupled with published research diagnostic  
13 criteria<sup>28</sup> and recommended quantitative parameters for sleep disturbance.<sup>29</sup> In  
14 keeping with DSM-5, the SCI also evaluates associated daytime factors, which are  
15 important drivers of clinical complaint<sup>21</sup> and should be incorporated in insomnia  
16 measurement.<sup>15,30</sup> In terms of utility, the SCI is brief but versatile. It yields a)  
17 a dimensional perspective on sleep quality: on an intuitive, global scale where higher  
18 scores represent better sleep; b) a visual profile of night-time and daytime symptoms  
19 that the clinician can use in consultations; and c) indicative cut-off points for clinically-  
20 significant Insomnia. This paper summarises the development and evaluation of the  
21 SCI across several studies, and in doing so addresses two major questions. First,  
22 does the SCI have adequate psychometric properties?; and second, is it possible to  
23 derive an even briefer, short-form, SCI that has similar psychometric characteristics?  
24  
25  
26  
27  
28  
29  
30  
31  
32  
33  
34  
35  
36

## 37 **METHODS**

### 38 **Sample characteristics**

39 Data are reported from five validation studies (total n=30,941; 71% Female) in which  
40 SCI items were administered. The Great British Sleep Survey (GBSS) was an open  
41 access, web-based survey completed by adults (18+yr.) with a UK postcode yielding  
42 data on 12,628 participants [72% Female; mean age = 38.7yr (SD = 14.5)] between  
43 February 2010 and August 2011.<sup>31</sup> The GBSS+ was a revision of the GBSS,  
44 extended to any valid zip code worldwide, from May 2011 to March 2012 (n=11,017;  
45 68% Female; 42.3yr (16.5)). The TV sample was obtained in response to a network  
46 programme (The Food Hospital, Channel 4) on the sleep benefits of tart cherry juice  
47 (n=6,876; 76% F, 36.4yr (13.3)). Glasgow Science Centre data (n=256; 56% Female,  
48  
49  
50  
51  
52  
53  
54  
55  
56

Formatted: Font color: Auto

Formatted: Font color: Auto

1  
2  
3  
4  
5  
6 40.3yr (14.9)) were collected in 2009-2010 during a study which assessed the  
7 relationship between salivary alpha-amylase, sleep pressure and diurnal  
8 preference.<sup>2832</sup> Finally, an RCT sample comprised 164 participants (72% F, 48.9yr  
9 (13.7)) recruited into a placebo-controlled evaluation of CBT for insomnia.<sup>3329</sup> Ethical  
10 agreement concerning the latter two studies are provided in the source manuscripts.  
11 For the open access web surveys participation was covered by the site terms.  
12  
13  
14  
15  
16

17 Across our combined largest samples (GBSS, GBSS+, TV), women were  
18 slightly younger than men [38.5 (14.9) vs 40.1 (14.7) yrs;  $t(27638) = 7.94$ ,  $p < .0001$ ]  
19 and the great majority was in average or better physical health (86%) and mental  
20 health (82%) [5-point scale: 0 'very good', 1 'good', 2 'average', 3 'poor', 4 'very  
21 poor']. Respondents who made some use of prescription sleeping pills (9.1%) were 7  
22 years older than those who did not [46.2 (15.1) vs 39.1 (15.1)yr,  $t(20813) = 19.6$ ,  
23  $p < .0001$ ] and had a substantially poorer SCI score [8.56 (4.93) vs 15.6 (7.80),  
24  $t(20813) = 38.8$ ,  $p < .0001$ ]. Of the total sample, 18.1% took over-the-counter sleep  
25 aids (OTCs), and more than one-third of those taking sleeping pills also used OTCs.  
26  
27  
28  
29  
30  
31  
32  
33  
34

### 35 Design and Measurement

36 This is a psychometric scale development study. Standard approaches to the  
37 appraisal of validity, reliability and sensitivity were applied, making appropriate  
38 selection amongst the available datasets. These methods and datasets will be  
39 introduced in an integrated way in subsequent sections, so that the research process  
40 can be more clearly expressed and understood.  
41  
42  
43  
44  
45  
46  
47  
48

## 49 RESULTS

### 50 Development of the Sleep Condition Indicator (SCI)

#### 51 Content Validity

Formatted: Font color: Auto

Formatted: Font color: Auto

1  
2  
3  
4  
5  
6 An 8-item scale was developed (see Appendix) based upon DSM-5 workgroup draft  
7 criteria that were available at the time (in 2010).<sup>7,8</sup> At that stage, a consultation  
8 process was underway and draft information was posted on the APA website.  
9  
10 Consequently, the SCI items generated comprised 2 quantitative items on sleep  
11 continuity [item 1: getting to sleep; item 2: remaining asleep], two qualitative items on  
12 sleep satisfaction/dissatisfaction [item 4: sleep quality; item 7: troubled or not], two  
13 quantitative items on severity [item 3: nights per week; item 8: duration of problem],  
14 and two qualitative items on attributed daytime consequences of poor sleep [item 5:  
15 effects on mood, energy, or relationships (personal functioning); item 6: effects on  
16 concentration, productivity, or ability to stay awake (daytime performance)].

17  
18  
19  
20  
21  
22  
23  
24 Validated quantitative criteria for sleep disruption (e.g. 31-45 minutes to fall  
25 asleep) served as responses for sleep continuity items 1 and 2.<sup>8,28,29</sup> Items 5 and 6  
26 on daytime effects were derived by Principal Components Analysis (PCA; Varimax  
27 rotation) of six individual proposed DSM-5 impact areas, using combined datasets  
28 (GBSS, GBSS+, TV, RCT: valid n= 29,650). PCA yielded satisfactory Kaiser-Meyer-  
29 Olkin (KMO=0.874) and Bartlett ( $p<.0001$ ) statistics. Iteration converged after 3  
30 rotations. A two component model (derived from inspection of the scree plot and a  
31 criterion for associated variance  $\geq 10\%$ ) explained 75.8% of total variance, with item  
32 loadings  $\geq .60$ . Component 1 (Eigenvalue=3.83; 63.8% of variance) comprised  
33 'mood' (loading = .812) 'energy' (.651) and 'relationships' (.859), and was  
34 subsequently named 'personal functioning'. Component 2 (Eigenvalue=0.72; 12.0%  
35 of variance) comprised 'concentration' (.719), 'get through work' (.724), and 'stay  
36 awake' (.875) may be regarded as 'daytime performance'. PCA offered a relatively  
37 pure solution, although 'energy' also loaded significantly on component 2 (.519).

38  
39  
40  
41  
42  
43  
44  
45  
46  
47  
48  
49 We then investigated the inter-relationships of our 8 SCI items using the  
50 same methodology, but applying this time a minimum item loading of 0.40, to permit  
51 incorporation of all eight items. PCA with Varimax Rotation (KMO=0.888; Bartlett,  
52  $p<.0001$ ) yielded a two component solution (66.4% explained variance). Component  
53  
54  
55  
56

Formatted: Font color: Auto

Formatted: Font color: Auto

Formatted: Font color: Auto

1  
2  
3  
4  
5  
6 1 (Eigenvalue=4.256, 53.2% variance), named 'sleep pattern' comprised items 1, 2,  
7  
8 3, 4 and 8 with factor loading ranging from 0.453 to 0.776. Component 2  
9  
10 (Eigenvalue=1.06, 13.2% variance), 'sleep-related impact' comprised item 5 (factor  
11  
12 loading 0.886), and item 6 (0.911). Consistent with clinical presentation, concerns  
13  
14 about sleep (item 7) loaded significantly, and similarly, on both 'sleep pattern' (0.616)  
15  
16 and 'sleep-related impact' components (0.576).

### 17 18 19 *Response format*

20  
21 Each item was scored on a 5-point scale (0 - 4), with lower scores, in the 0 – 2 range,  
22  
23 reflecting putative threshold criteria for Insomnia Disorder (shaded area: see  
24  
25 Appendix). The clinician can then see at a glance the profile of possible concerns.  
26  
27 Possible total score ranges from 0–32, with higher values indicative of better sleep.  
28  
29 However, scores can be readily transformed into a more intuitive 0-10 SCI range,  
30  
31 either by dividing the total by 3.2, or by using an online version with automated  
32  
33 scoring, which is available free of charge ([www.sleepio.com/clinic/](http://www.sleepio.com/clinic/)).

Field Code Changed

Formatted: Font color: Auto

### 34 35 36 *Concurrent Validity and association with related domains*

37  
38 Data from the Science Centre sample demonstrated that the SCI correlates inversely  
39  
40 with the PSQI ( $r=-.734$ ) and the ISI ( $r=-.793$ ), suggesting measurement properties  
41  
42 consistent with these related measures. There was also a small but significant  
43  
44 association of sleep condition with self-rated physical health ( $r=.222$ ), and an  
45  
46 association also with mental health ( $r=.335$ ). Using more specific measures, in the  
47  
48 Science Centre sample, correlation of the SCI with symptoms of depression ( $r=-.426$ )  
49  
50 and anxiety ( $r=-.400$ ) on the Hospital Anxiety and Depression Scale<sup>34</sup> was modest,  
51  
52 and greater than we observed in our RCT sample [on the Depression Anxiety Stress  
53  
54 Scale<sup>35</sup>: depression ( $r=-.267$ ), anxiety ( $r=-.236$ ) and stress ( $r=-.263$ )].



1  
2  
3  
4  
5  
6 We have not at this stage tested the discriminant validity of the SCI against clinical  
7 diagnosis of insomnia disorder. As a first step, however, using our Science Centre  
8 sample, we tested the concurrent validity of SCI cut-offs, ~~were able to compare the~~  
9 ~~discriminant ability of SCI (score  $\leq 16$ ),~~ reflecting minimum criteria for putative  
10 ~~Insomnia Disorder (see appendix), against~~ published validated ISI cut-off scores.  
11 We first categorized our sample according to ISI ranges (ISI score=0-14, reflecting  
12 ~~“no insomnia disorder” “absence of insomnia” or “sub-threshold insomnia”~~ [n=228]  
13 versus ~~“probable insomnia disorder” “moderate or severe insomnia”~~ ISI score=15-28,  
14 n=27]<sup>36</sup> and conducted an independent *t*-test on SCI total score. Mean SCI values  
15 for the ~~“probable insomnia disorder”~~ category were 10.7 (SD=5.3) versus 22.9  
16 (SD=6.2) for ~~“no insomnia disorder”~~ ( $t=9.86, p<.0001$ ). Applying SCI cut-off  $\leq 16$ , 89%  
17 of the sample were correctly identified as having ~~“probable insomnia disorder”~~ (ISI  
18 scores of  $\geq 15$ ), while SCI score of  $>16$  correctly identified 82% of those with ~~“no~~  
19 ~~insomnia disorder”~~. These findings provide further evidence of concurrent  
20 ~~validity~~ therefore suggest good discriminant validity for the SCI and help to confirm  
21 that a score of  $\leq 16$  on the SCI seems reasonable to detect possible insomnia  
22 disorder.  
23  
24  
25  
26  
27  
28  
29  
30  
31  
32  
33  
34  
35  
36

#### 37 38 *Internal consistency*

39 Cronbach's  $\alpha$  for the GBSS sample was strong at 0.857 (range of  *$\alpha$ -if-item-deleted*  
40 0.822-0.860). Replication of these internal consistency data was obtained from the  
41 GBSS+ sample ( $\alpha=0.865$ ). Mean corrected item-total correlation was moderate  
42 ( $r=0.620$ ) indicating substantial unique variance per item (shared variance = 38%).  
43  
44  
45  
46  
47  
48

#### 49 *Sensitivity to change*

50 We have previously reported that the SCI is sensitive as a measure of treatment  
51 outcome.<sup>33</sup>  
52  
53  
54  
55  
56  
57  
58  
59  
60

### Short-form version of the SCI

Although the SCI is brief, in clinical practice ultra short-form scales is often helpful (e.g. GAD-2).<sup>376</sup> Accordingly, we conducted a **stepwise** linear regression analysis to determine which subset of items (independent variables) explained the greatest proportion of variance in the dependent variable, SCI total score. A two-item (SCI-02), comprising item 3 '...how many nights' (standardized  $\beta = .515$ ) and item **78** '...troubled you in general' ( $\beta = .491$ ) together predicted 82% of variance (Adjusted  $R^2 = .820$ ) in the full scale SCI [ $R^2$  change =  $.672 + .148$ ;  $F(2,27637) = 62770$ ,  $p < .0001$ ]. As a check on the independence of residuals we computed the Durbin-Watson statistic, which was found to be 1.80, suggesting no serial correlation. The SCI-02 also correlated strongly with the SCI score total ( $r = .904$ ).

Formatted: Font color: Auto

Formatted: Font color: Auto

### DISCUSSION

Pre-requisite to improved insomnia care is the availability and regular use of reliable and valid insomnia assessment. Only then can a clinical problem be recognised as distinct from normal variation, and a persistent problem be differentiated from a transient one. We have reported here the development and preliminary validation of the SCI; a DSM-5 compliant, brief screening measure that may be fit for such purposes. Results indicate that the SCI is internally consistent, sensitive to change, and correlates strongly with established screening instruments, known to be sensitive to clinical insomnia (PSQI and ISI). Principal components analysis revealed a 2-component solution (66% of the variance), reflecting the underlying complaint of insomnia; that is, concerns about sleep pattern and concerns about the impact of poor sleep, both of which need to be addressed in clinical practice. The derived 2-item short-form version, focusing on the severity of the presenting complaint coupled with frequency of the sleep problem, correlated

strongly with total SCI score and we would suggest that these might be the lead questions for a clinician to use in the context of their consulting room practice.

Of course, further work is required, particularly real world studies of how the SCI might be used in population screening and in the evaluation of outcome following an episode of care. While comparisons with ISI cut-offs provide evidence of concurrent validity and indicate that suggest good discriminant ability of the SCI score  $\leq 16$  may help to detect probable insomnia disorder, ~~(score  $\leq 16$ )~~, studies of predictive validity with reference to independent clinical evaluation of Insomnia Disorder ~~(as the gold standard)~~, are essential before firm conclusions can be made.

It should be noted that over half of respondents to our online surveys, screened positive for possible Insomnia Disorder (cf.<sup>3</sup> These, of course, are not prevalence data as we did not adopt a formal population sampling approach. Nevertheless, the inevitable bias of these open access surveys towards those with sleep concerns does permit us a) to profile many respondents, against criteria; b) to conduct powerful analyses of the properties of the SCI; and c) to make comparisons with sizeable cohorts of good sleepers. Importantly, for our Science Centre sample, approximately 10% scored in the probable insomnia disorder range (ISI score  $\geq 15$ ), consistent with prevalence data (Morin reference),<sup>2</sup> providing further support for our ISI-SCI concurrent validity analysis comparing the ISI and SCI in this sample.

Furthermore, ~~a limitation of it should be noted that~~ the SCI is that it does not contain specific questions relating to early morning awakenings (EMA; premature awakening with inability to return to sleep) – a symptom which has recently been incorporated into DSM-5 criteria. While established insomnia questionnaires, including the ISI<sup>27</sup> and Athens Insomnia Scale<sup>37</sup> probe perceived severity of EMA, quantitative values for EMA, to our knowledge, are yet to be defined. To some extent, SCI item 2 on wakefulness during the night may capture this complaint, but we recommend that the clinician follows-up a 'positive' answer to locate the nature and temporal position of wakefulness during the sleep period. Moreover, ~~other core DSM-~~

Formatted: Superscript

Formatted: Font color: Auto

1  
2  
3  
4  
5  
6 5 criteria do not feature as SCI items (e.g. the sleep difficulty occurs despite  
7 adequate opportunity for sleep; the insomnia is not better explained by and does not  
8 occur exclusively during the course of another sleep-wake disorder; and the insomnia  
9 is not attributable to the physiological effects of a substance). However, these items  
10 are not easy to probe unambiguously with a self-completed psychometric instrument  
11 and would require careful scrutiny by a treating clinician. It is, of course, possible that  
12 sleep disorders other than insomnia (e.g. circadian rhythm sleep disorders, sleep-  
13 breathing disorders) may also lead to low scores on the SCI. -Thus, the SCI should  
14 be viewed as an insomnia screening tool, consistent with features of DSM-5, but  
15 requiring careful follow-up in clinical practice to fully define the nature of sleep  
16 disturbance.  
17  
18  
19  
20  
21  
22  
23  
24  
25  
26  
27  
28  
29  
30  
31  
32  
33  
34  
35  
36  
37  
38  
39  
40  
41  
42  
43  
44  
45  
46  
47  
48  
49  
50  
51  
52  
53  
54  
55  
56  
57  
58  
59  
60

## REFERENCES

1. Singleton N, Bumpstead R, O'Brien M, et al. Psychiatric morbidity among adults living in private households, 2000. London: The Office for National Statistics, HMSO; 2001.
2. Morin CM, Benca R. Chronic insomnia. *Lancet* 2012;379(9821):1129-41.
3. Falloon K, Arroll B, Elley CR, Fernando A. The assessment and management of insomnia in primary care. *BMJ* 2011; 342: d2899.
4. Lichstein K. Secondary insomnia: A myth dismissed. *Sleep Med Rev* 2006; 10: 3-5.
5. Stores G, Crawford C. Medical student education in sleep and its disorders. *J Royal College Physicians London* 1998; 32:149-153.
6. Harvey AG. Insomnia: Symptom or diagnosis? *Clinical Psychology Review* 2001;21:1037-1059.
7. Reynolds CF, Redline S. The DSM-V sleep-wake disorders nosology: An update and an invitation to the sleep community. *J Clin Sleep Med* 2010;15:9-10.
8. American Psychiatric Association. M00 Insomnia Disorder. DSM-5 Development Web site.

Formatted: Font: 11 pt, Font color: Auto

Formatted: Font color: Auto

http://www.dsm5.org/ProposedRevision/Pages/proposedrevision.aspx?rid=65#  
/ Updated June 2, 2010.

9. American Psychiatric Association. *Diagnostic and statistical manual of mental disorders* (5th ed.). Arlington, VA, 2013.

Formatted: Font: 11 pt, Font color: Auto, English (U.S.)

Formatted: Font color: Auto

10. Morin CM, Belanger L, LeBlanc M, et al. The natural history of insomnia: A population-based 3-year longitudinal study. *Archives of internal Medicine* 2009; 169:447-453.

11. Green, M., Benzeval, M., Espie, C.A., Hunt, K. The longitudinal course of insomnia symptoms: inequalities by gender and occupational class among two different age cohorts followed for 20 years in the West of Scotland. *SLEEP* 2012;35:385-393.

12. Vgontzas AN, Liao D, Bixler EO, Chrousos GP, Vela-Bueno A. Insomnia with objective short sleep duration is associated with a high risk for hypertension. *Sleep* 2009;32:491-7.

13. Vgontzas AN, Liao D, Pejovic S, Calhoun S, Karataraki M, Bixler EO. Insomnia with objective short sleep duration is associated with type 2 diabetes: a population-based Study. *Diabetes Care* 2009;32:1980-5.

14. Baglioni C, Battagliese G, Feige B, et al. Insomnia as a predictor of depression: A meta-analytic evaluation of longitudinal epidemiological studies. *J Affect Disord* 2011;135:10-19.

15. Kyle SD, Morgan K, Espie C. Insomnia and health-related quality of life. *Sleep Med Rev* 2010;14: 69-82.

~~16-15. Sivertsen B, Overland S, Neckelmann D, Glozier N, Krokstad S, Pallesen S, Nordhus I, Djorvatn B, Mykletun A. The long term effect of insomnia on work disability: The HUNT-2 historical cohort study. *Am J Epidemiol* 2006;163:1018-1024.~~

Formatted: Font color: Auto

Formatted: Don't adjust space between Latin and Asian text, Don't adjust space between Asian text and numbers

16. Leger D, Bayon V. Societal costs of insomnia. *Sleep Med Rev* 2010;14:379-389.

Formatted: English (U.S.)

1  
2  
3  
4  
5  
6 [47-Sivertsen B, Overland S, Neckelman D, Glozier N, Krokstad S, Pallesen S,  
7 Nordhus I, Bjorvatn B, Mykletun A. The long-term effect of insomnia on work  
8 disability: The HUNT-2 historical cohort study. Am J Epidemiol  
9 2006;163:1018-1024.](#)

10  
11  
12  
13  
14 ~~18-17.~~

Formatted: Font color: Auto

15 ~~19-18.~~ Morin CM, Bootzin RR, Buysse DJ, Edinger JD, Espie CA, Lichstein  
16 KL. Psychological and behavioral treatment of insomnia: Update of the recent  
17 evidence (1998-2004). Sleep 2006;29:1398-414.

18  
19  
20 ~~20-19.~~ Riemann D, Perlis ML. The treatments of chronic insomnia: A review  
21 of benzodiazepine receptor agonists and psychological and behavioral  
22 therapies. Sleep Med Rev 2009;13:205-214.

23  
24  
25 ~~21-20.~~ Espie, C.A. 'Stepped care': a health technology solution for delivering  
26 Cognitive Behavioral Therapy as a first line insomnia treatment. Sleep  
27 2009;32:1549-1558.

28  
29  
30 ~~22-21.~~ Morin CM, LeBlanc M, Daley JP, Merette C. Epidemiology of  
31 insomnia: Prevalence, self-help treatments, consultations, and determinants  
32 of help-seeking behaviors. Sleep Med 2006; 7: 123-130.

33  
34  
35 ~~23-22.~~ NICE Clinical Guideline 123. Common mental health disorders:  
36 Identification and pathways to care. 2011.

37  
38  
39 <http://www.nice.org.uk/nicemedia/live/13476/54520/54520.pdf>

Formatted: Default Paragraph Font, Font:  
(Default) Calibri, English (U.S.)

40  
41  
42 ~~24-23.~~ Kroenke, K., Spitzer, R.L. and Williams, J.B. (2001). The PHQ-9:  
43 Validity of a brief depression severity measure. Journal of General Internal  
44 Medicine, 16:606-613.

45  
46  
47 ~~25-24.~~ Spitzer, R,L,, Kroenke, K., Williams, J.B.W. and Lowe, B. (2006). A  
48 brief measure for assessing generalized anxiety disorder: The GAD-7.  
49 Archives of Internal Medicine, 166:1092-1097  
50  
51  
52

- 1  
2  
3  
4  
5  
6 | ~~26-25.~~ Bush, K., Kivlahan, D.R., McDonnell, M.B. et al. The AUDIT alcohol  
7 | consumption questions (AUDIT-C): An effective brief screening test for  
8 | problem drinking. Arch Intern Med 1998; 158; 1789-1795.  
9  
10  
11 | ~~27-26.~~ Buysse DJ, Reynolds III CF, Monk TH, et al. The Pittsburgh Sleep  
12 | Quality Index: a new instrument for psychiatric practice and research. Psych  
13 | Res 1989; 28: 193–213.  
14  
15  
16  
17 | ~~28-27.~~ Morin C.M. Insomnia: Psychological assessment and management.  
18 | 1993. New York: Guilford.  
19  
20  
21 | ~~29-28.~~ Edinger JD, Bonnet MH, Bootzin RR, Doghramji K, Dorsey CM, Espie  
22 | CA et al. Derivation of research diagnostic criteria for insomnia: Report of an  
23 | American Academy of Sleep Medicine Work Group. Sleep. 2004;27:1567-96.  
24  
25  
26 | ~~30-29.~~ Lichstein KL, Durrence HH, Taylor DJ, Bush AJ, Riedel BW.  
27 | Quantitative criteria for insomnia. Behav Res Ther 2003;41:427-445.  
28  
29  
30 | ~~31-30.~~ Moul DE, Hall M, Pilkonis PA, Buysse, DJ. Self-report measures of  
31 | insomnia in adults: rationales, choices, and needs. Sleep Med Rev 2004; 8:  
32 | 177-198.  
33  
34  
35 | ~~32-31.~~ Espie CA, Kyle SD, Hames P, Cyhlarova E, Benzeval. The daytime  
36 | impact of DSM-5 Insomnia Disorder: comparative analysis of insomnia  
37 | subtypes from the Great British Sleep Survey (n=11,129). J Clin Psychiatry  
38 | 73(12):e1478-1484  
39  
40  
41  
42 | ~~33-32.~~ Gardani M, Miller CB, Biello S, Ellis J, Von Schantz M, Archer S. The  
43 | association of sleepiness and diurnal preference with salivary amylase  
44 | activity. Abstracts of 4th International Congress of WASM & 5th Conference  
45 | of CSS / Sleep Medicine 12, Suppl. 1 (2011) S1–S130.  
46  
47  
48  
49 | ~~34-33.~~ Espie CA, Kyle SD, Williams C, et al. A randomized, placebo-  
50 | controlled, trial of online Cognitive Behavioral Therapy for chronic Insomnia  
51 | Disorder delivered via an automated media-rich web application. Sleep 2012;  
52 | 35: 769-781.  
53  
54  
55



1  
2  
3  
4  
5  
6 ~~35-34.~~ Zigmond AS, Snaith RP. The hospital anxiety and depression scale.

7 Acta Psychiatrica Scandinavica 1983; 67: 361-370.

8  
9  
10 [35.](#) Henry JD, Crawford JR. The short-form version of the Depression Anxiety

11 Stress Scales (DASS-21): Construct validity and normative data in a large

12 non-clinical sample, Br J Clin Psychol 2005;44:227-239.

13  
14  
15 ~~36-~~ Kroenke K, Spitzer RL, Williams JB, et al. Anxiety disorders in primary care:

16 prevalence, impairment, comorbidity, and detection. Ann Intern Med

17 2007;146:317-25.

18  
19  
20  
21 ~~37-36.~~

22  
23 ~~38-37.~~ Soldatos CR, Dikeos DG, Paprigopoulos TJ. Athens insomnia scale:

24 validation of an instrument based on ICD-10 criteria. J Psychosom Res

25 2000;48:555-560.

Formatted: Indent: Left: 0.25", Hanging: 0.25", Line spacing: Double

Formatted: Font: (Default) Arial

## Appendix: The Sleep Condition Indicator

| Item                                                                                                                | Score                           |             |             |             |           |
|---------------------------------------------------------------------------------------------------------------------|---------------------------------|-------------|-------------|-------------|-----------|
|                                                                                                                     | 4                               | 3           | 2           | 1           | 0         |
| <b>Thinking about a typical night in the last month ...</b>                                                         |                                 |             |             |             |           |
| 1. ... how long does it take you to fall asleep?                                                                    | 0 – 15 min                      | 16 – 30 min | 31 – 45 min | 46 – 60 min | ≥ 61 min  |
| 2. ... if you then wake up during the night ... how long are you awake for in total?<br>(add all the awakenings up) | 0 – 15 min                      | 16 – 30 min | 31 – 45 min | 46 – 60 min | ≥ 61 min  |
| 3. ... how many nights a week do you have a problem with your sleep?                                                | 0 - 1                           | 2           | 3           | 4           | 5 - 7     |
| 4. ... how would you rate your sleep quality?                                                                       | Very good                       | Good        | Average     | Poor        | Very poor |
| <b>Thinking about the past month, to what extent has poor sleep ...</b>                                             |                                 |             |             |             |           |
| 5. ... affected your mood, energy, or relationships?                                                                | Not at all                      | A little    | Somewhat    | Much        | Very much |
| 6. ... affected your concentration, productivity, or ability to stay awake                                          | Not at all                      | A little    | Somewhat    | Much        | Very much |
| 7. ... troubled you in general                                                                                      | Not at all                      | A little    | Somewhat    | Much        | Very much |
| <b>Finally ...</b>                                                                                                  |                                 |             |             |             |           |
| 8. ... how long have you had a problem with your sleep?                                                             | I don't have a problem / < 1 mo | 1 – 2 mo    | 3 – 6 mo    | 7 – 12 mo   | > 1 yr    |

## Scoring instructions:

- Add the item scores to obtain the SCI total (minimum 0, maximum 32)
- A higher score means better sleep
- Scores can be converted to 0 – 10 format (minimum 0, maximum 10) by dividing total by 3.2
- Item scores in grey area represent threshold criteria for Insomnia Disorder

A free online version, with built-in score convertor can be found at [www.sleepio.com/clinic](http://www.sleepio.com/clinic)

## Appendix: The Sleep Condition Indicator

| Item                                                                                                                | Score                           |             |             |             |           |
|---------------------------------------------------------------------------------------------------------------------|---------------------------------|-------------|-------------|-------------|-----------|
|                                                                                                                     | 4                               | 3           | 2           | 1           | 0         |
| <b>Thinking about a typical night in the last month ...</b>                                                         |                                 |             |             |             |           |
| 1. ... how long does it take you to fall asleep?                                                                    | 0 – 15 min                      | 16 – 30 min | 31 – 45 min | 46 – 60 min | ≥ 61 min  |
| 2. ... if you then wake up during the night ... how long are you awake for in total?<br>(add all the awakenings up) | 0 – 15 min                      | 16 – 30 min | 31 – 45 min | 46 – 60 min | ≥ 61 min  |
| 3. ... how many nights a week do you have a problem with your sleep?                                                | 0 - 1                           | 2           | 3           | 4           | 5 - 7     |
| 4. ... how would you rate your sleep quality?                                                                       | Very good                       | Good        | Average     | Poor        | Very poor |
| <b>Thinking about the past month, to what extent has poor sleep ...</b>                                             |                                 |             |             |             |           |
| 5. ... affected your mood, energy, or relationships?                                                                | Not at all                      | A little    | Somewhat    | Much        | Very much |
| 6. ... affected your concentration, productivity, or ability to stay awake                                          | Not at all                      | A little    | Somewhat    | Much        | Very much |
| 7. ... troubled you in general                                                                                      | Not at all                      | A little    | Somewhat    | Much        | Very much |
| <b>Finally ...</b>                                                                                                  |                                 |             |             |             |           |
| 8. ... how long have you had a problem with your sleep?                                                             | I don't have a problem / < 1 mo | 1 – 2 mo    | 3 – 6 mo    | 7 – 12 mo   | > 1 yr    |

## Scoring instructions:

- Add the item scores to obtain the SCI total (minimum 0, maximum 32)
- A higher score means better sleep
- Scores can be converted to 0 – 10 format (minimum 0, maximum 10) by dividing total by 3.2
- Item scores in grey area represent threshold criteria for Insomnia Disorder

1  
2  
3  
4  
5  
6  
7  
8  
9  
10  
11  
12  
13  
14  
15  
16  
17  
18  
19  
20  
21  
22  
23  
24  
25  
26  
27  
28  
29  
30  
31  
32  
33  
34  
35  
36  
37  
38  
39  
40  
41  
42  
43  
44  
45  
46  
47  
48  
49  
50  
51  
52  
53  
54  
55  
56  
57  
58  
59  
60

A free online version, with built-in score convertor can be found at [www.sleepio.com/clinic](http://www.sleepio.com/clinic)

For peer review only
